# Supplementary material for: Impact of Backbone Substitution on Organocatalytic Activity of Sterically Encumbered NHC in Benzoin Condensation
Source: MDPI journal article supplement (doi:10.3390/molecules29081704), 2024-04-10
Supplement: s1 [file s1]

# **Supporting Information**

for the article

The Impact of the Backbone Substitution on the Organocatalytic  
Activity of Sterically Encumbered NHC in Benzoin Condensation

Rinat R. Aysin and Konstantin I. Galkin

## Table of Contents

|                                                       |   |
|-------------------------------------------------------|---|
| 1. General Information.....                           | 2 |
| 2. Mechanistic studies.....                           | 2 |
| 2.1. Experimental study on benzoin condensation ..... | 2 |
| 2.2. Selected NMR spectra of reaction mixtures.....   | 4 |
| 3. DFT calculations.....                              | 6 |
| 3.1. Computational details .....                      | 6 |
| 3.2. Optimized xyz-Cartesian coordinates .....        | 9 |

## 1. General Information

Commercially available starting compounds, reagents, and solvents were of analytical grade upon purchase or purified prior to use by standard methods. Imidazolium salts [IMes<sup>Me</sup>H]Cl and [IPr<sup>Me</sup>H]Cl were obtained by using published synthetic protocols (*New J. Chem.* **2017**, *41*, 1057-1063). NMR spectra were recorded using a Bruker Avance 300 spectrometer operating at 300.1 MHz for <sup>1</sup>H and 75.5 MHz for <sup>13</sup>C. NMR chemical shifts were measured relative to residual solvent peaks. The processing was carried out using the MestReNova software.

## 2. Mechanistic studies

### 2.1. Experimental study on benzoin condensation

#### General procedure for benzoin condensation.

A mixture of aldehyde (0.5 mmol), imidazolium chloride (0.05 mmol) and a base (0.5 mmol) in deuterated acetonitrile was treated at the appropriate temperature and time conditions (24 h at 22 °C or 3 h at 80 °C) under an argon atmosphere. The degree of conversion and the yield of benzoin condensation products were measured by NMR using PhSiMe<sub>3</sub> as internal standard. The results of the reactions are summarized in Table S1.

**Table S1.** Influence of methylation at the C-4,5 positions on catalytic activity of [IMesH]<sup>+</sup> and [IPrH]<sup>+</sup> in benzoin condensation of aromatic aldehydes.

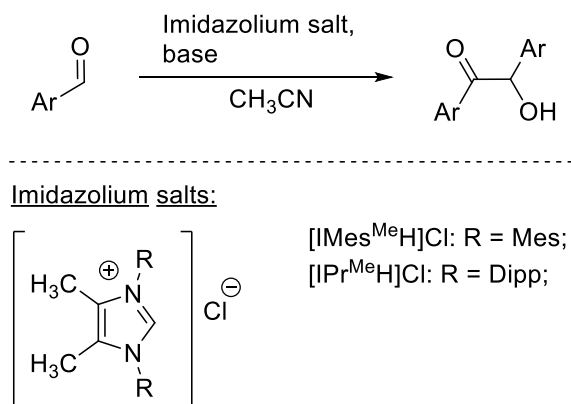

| No | Imidazolium salt, base                      | Aldehyde               | T (°C) | Conversion/yield of benzoin (%) <sup>a</sup> |
|----|---------------------------------------------|------------------------|--------|----------------------------------------------|
| 1  | [IMes <sup>Me</sup> H]Cl, DBU               | Furfural               | 22 °C  | 99/42                                        |
| 2  | [IMes <sup>Me</sup> H]Cl, DBU               | 5-Methylfurfural       | 22 °C  | 93/67                                        |
| 3  | [IMes <sup>Me</sup> H]Cl, DBU               | Benzaldehyde           | 80 °C  | 29/6                                         |
| 4  | [IMes <sup>Me</sup> H]Cl, DBU               | <i>m</i> -Anisaldehyde | 80 °C  | 23/9                                         |
| 5  | [IPr <sup>Me</sup> H]Cl, DBU                | Furfural               | 80 °C  | 29/0                                         |
| 6  | [IPr <sup>Me</sup> H]Cl, <sup>t</sup> BuONa | Furfural               | 80 °C  | 48/0                                         |
| 7  | [IPr <sup>Me</sup> H]Cl, DBU                | 5-Methylfurfural       | 80 °C  | 2/0                                          |
| 8  | [IPr <sup>Me</sup> H]Cl, DBU                | Benzaldehyde           | 80 °C  | 9/0                                          |
| 9  | [IPr <sup>Me</sup> H]Cl, DBU                | <i>m</i> -Anisaldehyde | 80 °C  | 16/0                                         |

<sup>a</sup> Yields and conversions were determined by <sup>1</sup>H nuclear magnetic resonance (NMR) analysis of crude reaction mixtures (isolated yields were not determined). Consumption of two benzaldehyde molecules to yield one molecule of benzoin product has been accounted.

## 2.2. Selected NMR spectra of reaction mixtures

**Figure S1.**  $^1\text{H}$  NMR spectra of the reaction mixture (conditions from entry 2, Table S1).

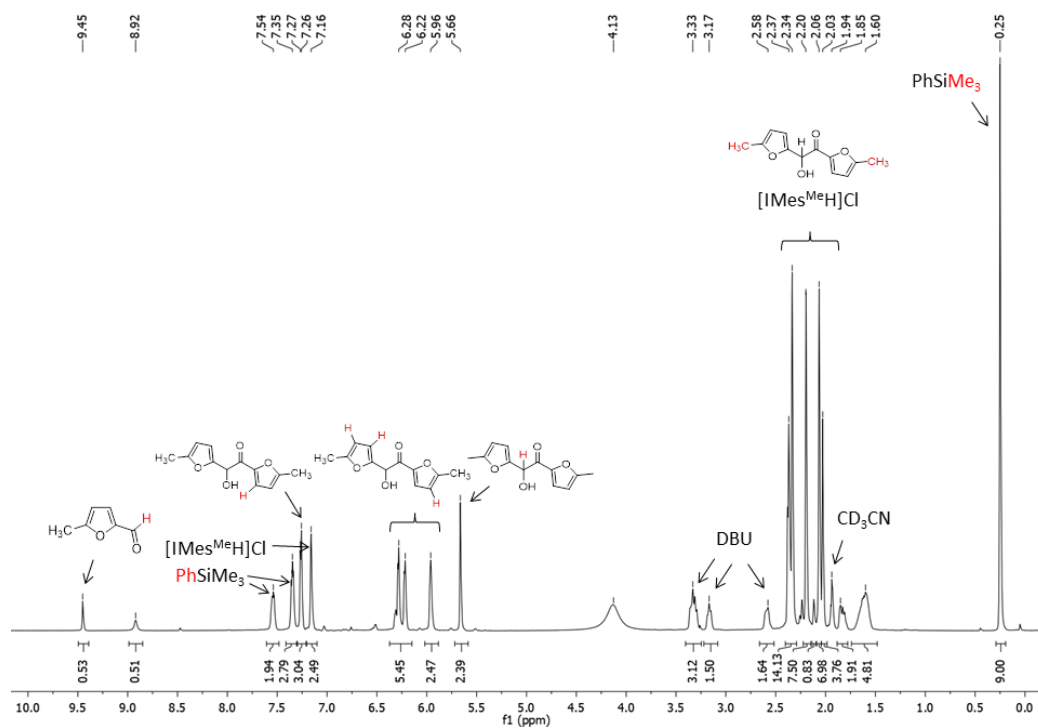

**Figure S2.**  $^1\text{H}$  NMR spectra of the reaction mixture (conditions from entry 3, Table S1).

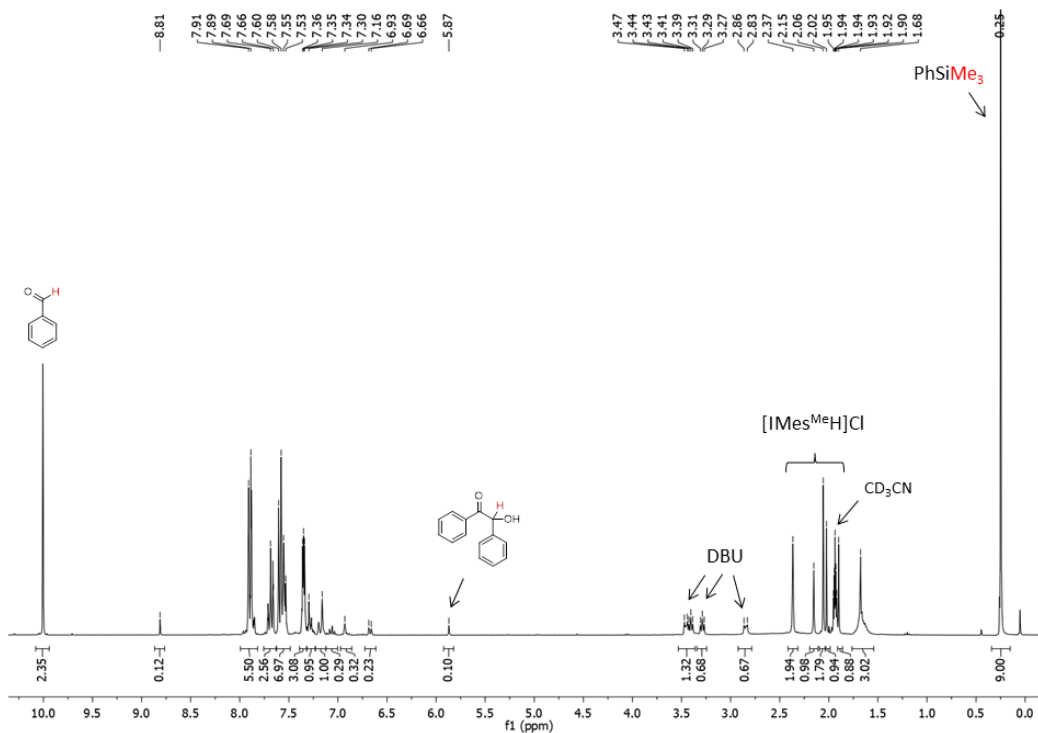

**Figure S3.**  $^1\text{H}$  NMR spectra of the reaction mixture (conditions from entry 6, Table S1).

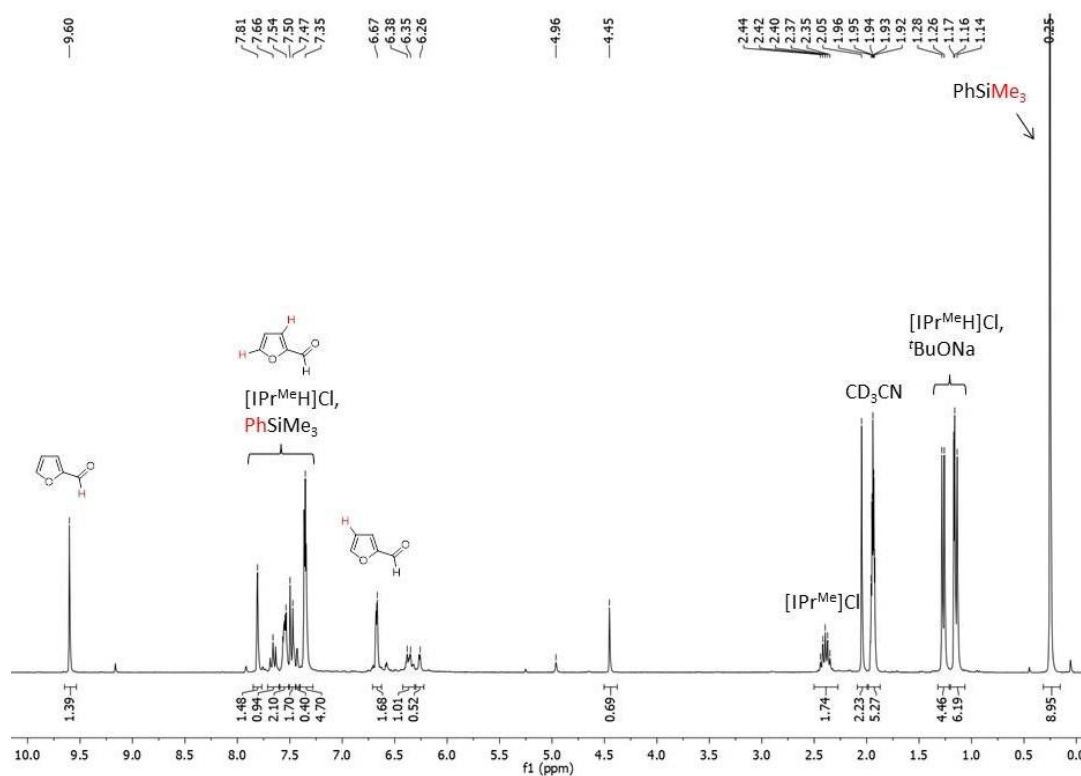

**Figure S4.**  $^1\text{H}$  NMR spectra of the reaction mixture (conditions from entry 9, Table S1).

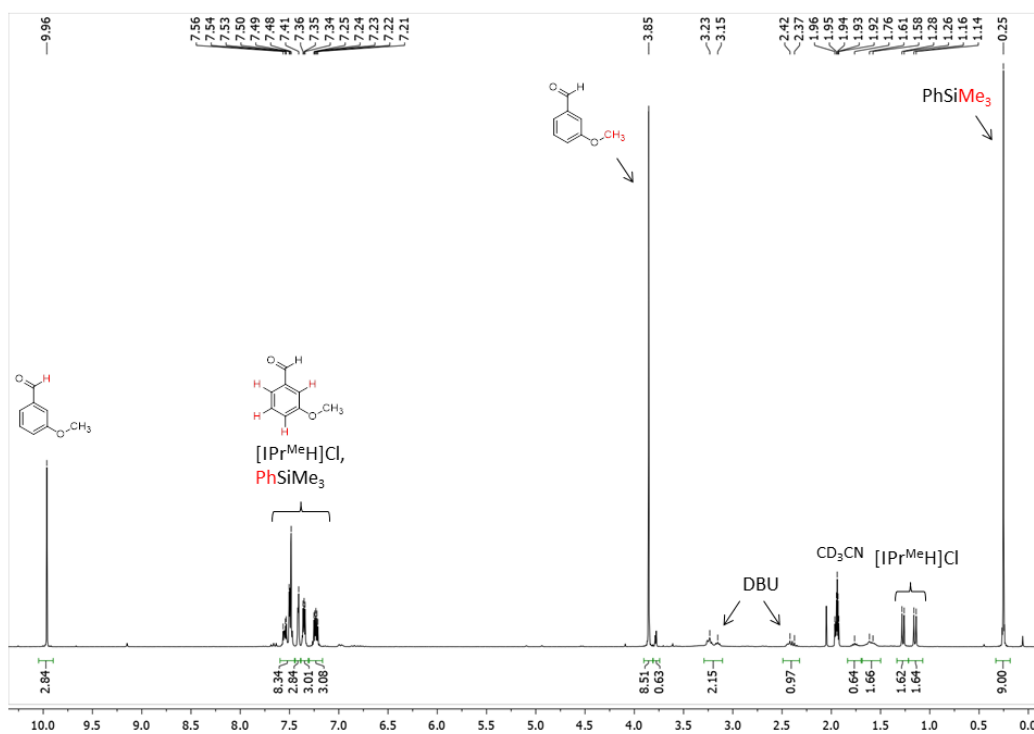

### 3. DFT calculations

#### 3.1. Computational details

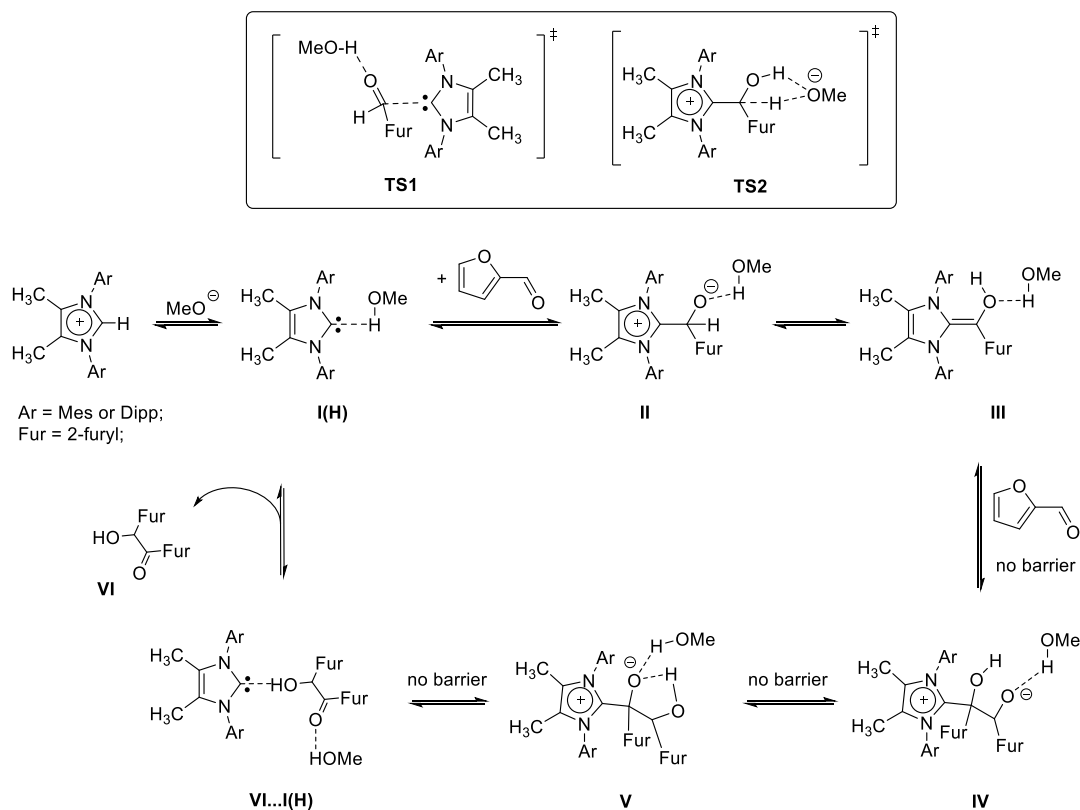

**Scheme S1.** The studied mechanism of benzoin condensation of furfural.

**Table S2.** Arbitrary energy values for the benzoin condensation of furfural mediated by [IMes<sup>Me</sup>H]<sup>+</sup> and [IPr<sup>Me</sup>H]<sup>+</sup>-derived catalytically active intermediates.

| Reaction participant                | $\Delta E_{\text{tot}}$ ,<br>kcal/mol | $\Delta H^{\circ}_{298}$ ,<br>kcal/mol | $\Delta G^{\circ}_{298}$ ,<br>kcal/mol |
|-------------------------------------|---------------------------------------|----------------------------------------|----------------------------------------|
| [IMes <sup>Me</sup> H] <sup>+</sup> | 0.0                                   | 0.0                                    | 0.0                                    |
| IMes <sup>Me</sup> -I(H)            | -17.6                                 | -16.8                                  | -23.0                                  |
| IMes <sup>Me</sup> -TS1             | -11.8                                 | -10.7                                  | -3.4                                   |
| IMes <sup>Me</sup> -II              | -28.1                                 | -28.4                                  | -17.4                                  |
| IMes <sup>Me</sup> -TS2             | -9.4                                  | -8.5                                   | -0.1                                   |
| IMes <sup>Me</sup> -III             | -21.2                                 | -18.9                                  | -14.0                                  |
| IMes <sup>Me</sup> -IV              | -23.5                                 | -24.5                                  | 2.8                                    |
| IMes <sup>Me</sup> -V               | -26.4                                 | -26.4                                  | -1.5                                   |
| VI...IMes <sup>Me</sup> -I(H)       | -29.6                                 | -28.8                                  | -7.1                                   |
| VI + IMes <sup>Me</sup> -I(H)       | -24.6                                 | -24.7                                  | -16.1                                  |

|                                                  |       |       |       |
|--------------------------------------------------|-------|-------|-------|
| $[\text{IPr}^{\text{Me}}\text{H}]^+$             | 0.0   | 0.0   | 0.0   |
| $\text{IPr}^{\text{Me}}\text{-I(H)}$             | -19.2 | -18.1 | -25.0 |
| $\text{IPr}^{\text{Me}}\text{-TS1}$              | -7.2  | -6.1  | 1.2   |
| $\text{IPr}^{\text{Me}}\text{-II}$               | -25.1 | -24.5 | -15.8 |
| $\text{IPr}^{\text{Me}}\text{-TS2}$              | -2.9  | -3.1  | 7.8   |
| $\text{IPr}^{\text{Me}}\text{-III}$              | -18.2 | -17.1 | -9.0  |
| $\text{IPr}^{\text{Me}}\text{-IV}$               | -18.5 | -18.5 | 6.3   |
| $\text{IPr}^{\text{Me}}\text{-V}$                | -19.9 | -19.7 | 4.7   |
| $\text{VI... IPr}^{\text{Me}}\text{-I(H)}$       | -31.5 | -30.0 | -9.7  |
| $\text{VI} + \text{IPr}^{\text{Me}}\text{-I(H)}$ | -26.2 | -26.0 | -18.1 |

**Figure S5.** PES scan for the  $[\text{IMes}^{\text{Me}}\text{H}]^+$  deprotonation.

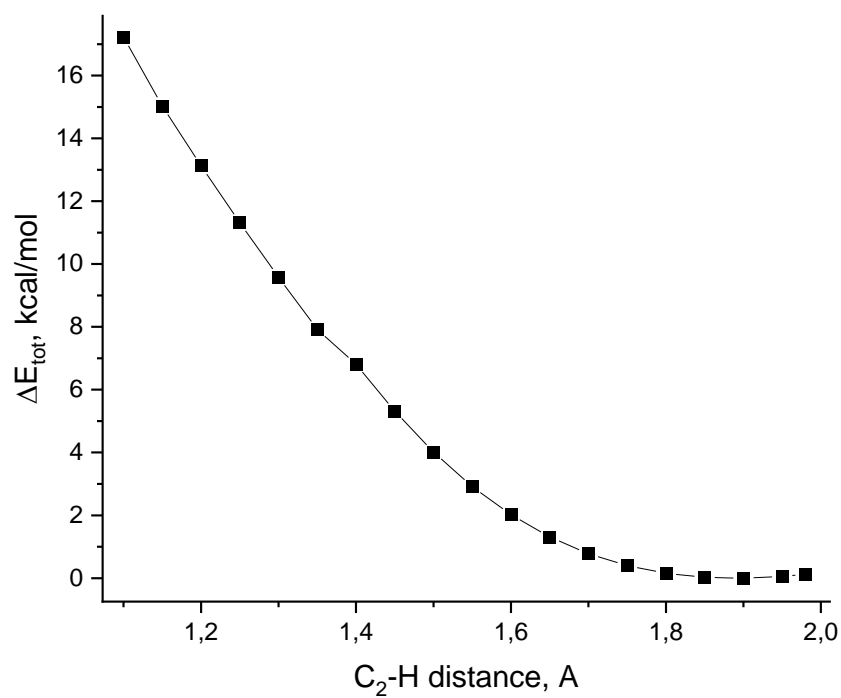



**Figure S6.** PES scan for the **IMes<sup>Me</sup>-III** to **IMes<sup>Me</sup>-IV** stage.

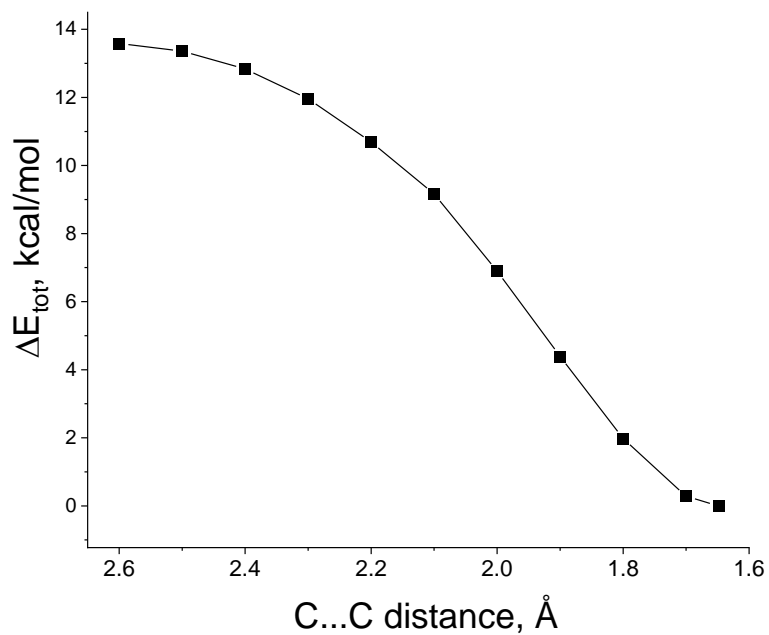

**Figure S7.** PES scan for the **IMes<sup>Me</sup>-V** to **VI...IMes-I(H)** stage.

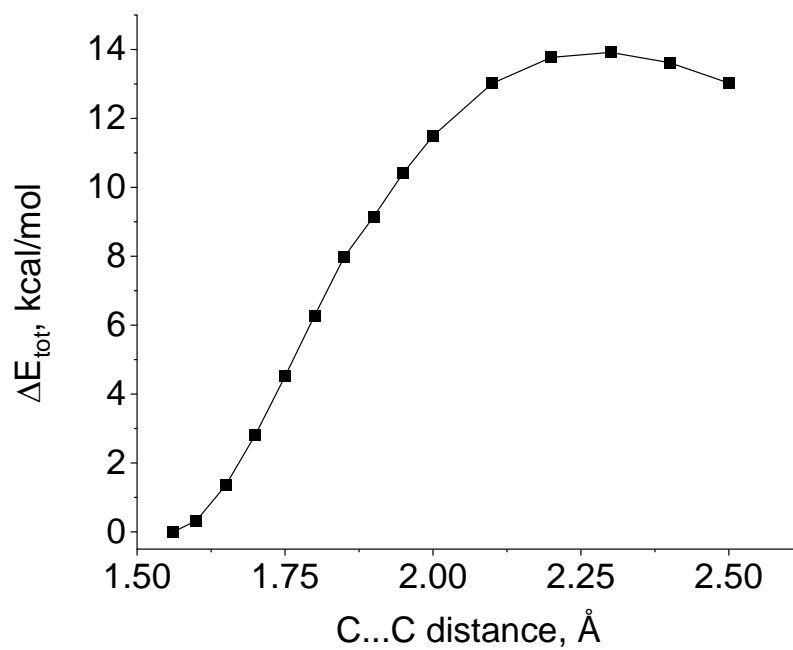

### 3.2. Optimized xyz-Cartesian coordinates

[IMes<sup>Me</sup>H]<sup>+</sup> Etot = -1002.476003950496 a.u.

|   |              |              |              |
|---|--------------|--------------|--------------|
| C | -0.007820000 | 0.000581000  | -0.112038000 |
| C | 0.688827000  | 0.002005000  | 1.981084000  |
| C | -0.677043000 | 0.002308000  | 1.992549000  |
| N | 1.076799000  | 0.000881000  | 0.652775000  |
| N | -1.082944000 | 0.001501000  | 0.667121000  |
| C | -2.437398000 | 0.000622000  | 0.183621000  |
| C | -3.068489000 | 1.225259000  | -0.033260000 |
| C | -3.065822000 | -1.225069000 | -0.035887000 |
| C | -4.377784000 | 1.194078000  | -0.494840000 |
| C | -4.375153000 | -1.195825000 | -0.497232000 |
| C | -5.046824000 | -0.001310000 | -0.736207000 |
| H | -4.890999000 | 2.134261000  | -0.667784000 |
| H | -4.886352000 | -2.136789000 | -0.671991000 |
| C | 2.430766000  | -0.000018000 | 0.168356000  |
| C | 3.060769000  | -1.225466000 | -0.046112000 |
| C | 3.061858000  | 1.224777000  | -0.047513000 |
| C | 4.374881000  | -1.195991000 | -0.494031000 |
| C | 4.375800000  | 1.193728000  | -0.495364000 |
| C | 5.048658000  | -0.001606000 | -0.726398000 |
| H | 4.888086000  | -2.136864000 | -0.663428000 |
| H | 4.889780000  | 2.134000000  | -0.665863000 |
| C | 2.359186000  | 2.529031000  | 0.178242000  |
| H | 1.565782000  | 2.689101000  | -0.557965000 |
| H | 1.897757000  | 2.585102000  | 1.167288000  |
| H | 3.058335000  | 3.359428000  | 0.089297000  |
| C | 2.357170000  | -2.528948000 | 0.181205000  |
| H | 1.895539000  | -2.583425000 | 1.170247000  |
| H | 1.563788000  | -2.689445000 | -0.554929000 |
| H | 3.055770000  | -3.359933000 | 0.093440000  |
| C | -2.373928000 | 2.528553000  | 0.219756000  |
| H | -2.010753000 | 2.604505000  | 1.248079000  |
| H | -1.511284000 | 2.662368000  | -0.439240000 |
| H | -3.052337000 | 3.362440000  | 0.045185000  |
| C | -2.368383000 | -2.527321000 | 0.214670000  |
| H | -1.507757000 | -2.659689000 | -0.447264000 |
| H | -2.001614000 | -2.602879000 | 1.241762000  |
| H | -3.046040000 | -3.362242000 | 0.042116000  |
| C | -6.447839000 | -0.002636000 | -1.261813000 |
| H | -6.444681000 | -0.014774000 | -2.355885000 |
| H | -6.998699000 | -0.882619000 | -0.927584000 |
| H | -6.993434000 | 0.887529000  | -0.946732000 |
| C | 6.455890000  | -0.002043000 | -1.235316000 |

|   |              |              |              |
|---|--------------|--------------|--------------|
| H | 6.466005000  | 0.013621000  | -2.329297000 |
| H | 7.004832000  | 0.875517000  | -0.891646000 |
| H | 6.995597000  | -0.894459000 | -0.916502000 |
| H | -0.015539000 | -0.000492000 | -1.189382000 |
| C | -1.631266000 | 0.004881000  | 3.127727000  |
| H | -2.658256000 | -0.033995000 | 2.764673000  |
| H | -1.470301000 | -0.856040000 | 3.779484000  |
| H | -1.522008000 | 0.906540000  | 3.734053000  |
| C | 1.658915000  | 0.002872000  | 3.098107000  |
| H | 1.128819000  | -0.001075000 | 4.049497000  |
| H | 2.308931000  | -0.874646000 | 3.065228000  |
| H | 2.302308000  | 0.885453000  | 3.069595000  |

**IMes<sup>Me</sup>-I(H)**      Etot = -1117.631512787924 a.u.

|   |              |              |              |
|---|--------------|--------------|--------------|
| C | -1.776416000 | 0.521365000  | -0.171676000 |
| C | -2.521682000 | 2.239627000  | -1.485649000 |
| C | -1.211233000 | 2.050537000  | -1.776940000 |
| N | -2.831590000 | 1.299127000  | -0.506485000 |
| N | -0.789111000 | 1.004371000  | -0.960465000 |
| C | 0.542534000  | 0.490792000  | -0.952184000 |
| C | 1.499532000  | 1.111940000  | -0.147508000 |
| C | 0.853605000  | -0.616006000 | -1.739276000 |
| C | 2.794688000  | 0.612926000  | -0.163386000 |
| C | 2.165907000  | -1.079264000 | -1.722530000 |
| C | 3.149499000  | -0.478119000 | -0.949897000 |
| H | 3.545442000  | 1.085379000  | 0.463338000  |
| H | 2.420427000  | -1.942647000 | -2.329742000 |
| C | -4.123966000 | 1.162700000  | 0.083598000  |
| C | -5.019784000 | 0.231238000  | -0.440596000 |
| C | -4.457949000 | 1.970886000  | 1.170253000  |
| C | -6.279212000 | 0.139903000  | 0.141519000  |
| C | -5.727991000 | 1.842389000  | 1.718771000  |
| C | -6.652953000 | 0.934146000  | 1.217979000  |
| H | -6.987227000 | -0.578761000 | -0.260379000 |
| H | -5.998965000 | 2.467861000  | 2.564147000  |
| C | -3.465429000 | 2.930282000  | 1.751982000  |
| H | -2.578732000 | 2.399480000  | 2.108491000  |
| H | -3.119459000 | 3.659665000  | 1.014782000  |
| H | -3.901153000 | 3.475341000  | 2.589712000  |
| C | -4.631818000 | -0.673115000 | -1.568389000 |
| H | -4.132343000 | -0.130197000 | -2.374179000 |
| H | -3.935467000 | -1.439682000 | -1.213671000 |
| H | -5.510295000 | -1.170551000 | -1.981117000 |
| C | 1.131189000  | 2.262621000  | 0.737886000  |
| H | 0.734364000  | 3.107359000  | 0.168406000  |

|   |              |              |              |
|---|--------------|--------------|--------------|
| H | 0.353601000  | 1.969762000  | 1.448213000  |
| H | 1.998819000  | 2.610276000  | 1.299221000  |
| C | -0.193912000 | -1.319628000 | -2.544476000 |
| H | -0.853832000 | -1.893430000 | -1.886096000 |
| H | -0.821120000 | -0.618648000 | -3.100029000 |
| H | 0.265746000  | -2.007928000 | -3.254748000 |
| C | 4.561511000  | -0.981492000 | -0.965973000 |
| H | 4.975219000  | -1.035542000 | 0.043585000  |
| H | 4.623939000  | -1.974924000 | -1.412334000 |
| H | 5.208506000  | -0.316025000 | -1.545637000 |
| C | -8.007068000 | 0.790241000  | 1.844885000  |
| H | -7.998746000 | 0.011612000  | 2.613990000  |
| H | -8.326077000 | 1.718255000  | 2.322687000  |
| H | -8.760001000 | 0.509232000  | 1.106118000  |
| H | -1.927694000 | -1.300776000 | 0.311151000  |
| O | -2.082546000 | -2.280109000 | 0.308928000  |
| C | -1.935496000 | -2.764347000 | 1.613639000  |
| H | -2.126916000 | -3.840432000 | 1.603395000  |
| H | -0.921574000 | -2.607956000 | 2.007993000  |
| H | -2.645654000 | -2.304043000 | 2.314846000  |
| C | -0.320880000 | 2.724430000  | -2.751457000 |
| H | 0.541633000  | 3.186358000  | -2.263018000 |
| H | 0.070578000  | 2.020317000  | -3.491103000 |
| H | -0.865346000 | 3.504721000  | -3.283486000 |
| C | -3.517647000 | 3.185836000  | -2.041792000 |
| H | -3.057900000 | 3.812550000  | -2.806097000 |
| H | -4.359876000 | 2.658151000  | -2.498058000 |
| H | -3.931449000 | 3.842161000  | -1.271066000 |

# **IMes<sup>Me</sup>-TS1**

Etot = -1460.730495766639 a.u.

|   |              |              |              |
|---|--------------|--------------|--------------|
| C | -2.126372000 | 2.238476000  | 1.120578000  |
| C | -1.294351000 | 3.080325000  | 0.460829000  |
| N | -1.709169000 | 0.951480000  | 0.786059000  |
| C | -0.659206000 | 0.961095000  | -0.059289000 |
| N | -0.408685000 | 2.270499000  | -0.248200000 |
| H | 2.182601000  | -0.585308000 | 1.424993000  |
| O | 2.293916000  | -0.682164000 | 2.399698000  |
| C | 0.686252000  | -0.745158000 | -0.512615000 |
| O | 1.834026000  | -0.389487000 | -0.221395000 |
| C | 0.606512000  | 2.789337000  | -1.111934000 |
| C | 1.859547000  | 3.097793000  | -0.584322000 |
| C | 0.296293000  | 3.003198000  | -2.453782000 |
| C | 2.810399000  | 3.631621000  | -1.445632000 |
| C | 1.280980000  | 3.539088000  | -3.274417000 |
| C | 2.544194000  | 3.855281000  | -2.790577000 |

|   |              |              |              |
|---|--------------|--------------|--------------|
| H | 3.791876000  | 3.874379000  | -1.049822000 |
| H | 1.051965000  | 3.712928000  | -4.321633000 |
| C | -2.347586000 | -0.239015000 | 1.251885000  |
| C | -3.341928000 | -0.815364000 | 0.458920000  |
| C | -1.982025000 | -0.777750000 | 2.485782000  |
| C | -3.960853000 | -1.969468000 | 0.921094000  |
| C | -2.636528000 | -1.932236000 | 2.905604000  |
| C | -3.618397000 | -2.545741000 | 2.139561000  |
| H | -4.737392000 | -2.425950000 | 0.314566000  |
| H | -2.364925000 | -2.361887000 | 3.865068000  |
| C | 3.603693000  | 4.397021000  | -3.701909000 |
| H | 4.233865000  | 3.588857000  | -4.086024000 |
| H | 3.167408000  | 4.909558000  | -4.561103000 |
| H | 4.257757000  | 5.098410000  | -3.180306000 |
| C | 2.185927000  | 2.843087000  | 0.853099000  |
| H | 1.434982000  | 3.265079000  | 1.525777000  |
| H | 2.229685000  | 1.769826000  | 1.053189000  |
| H | 3.153069000  | 3.276488000  | 1.109179000  |
| C | -0.910197000 | -0.165028000 | 3.332141000  |
| H | 0.090787000  | -0.440359000 | 2.981234000  |
| H | -0.956795000 | 0.925547000  | 3.328148000  |
| H | -1.001372000 | -0.507249000 | 4.364025000  |
| C | -3.731082000 | -0.209381000 | -0.854689000 |
| H | -4.028768000 | 0.836823000  | -0.743830000 |
| H | -2.895620000 | -0.227829000 | -1.559530000 |
| H | -4.565215000 | -0.754597000 | -1.297241000 |
| C | -4.278828000 | -3.808820000 | 2.603349000  |
| H | -3.742941000 | -4.686820000 | 2.229506000  |
| H | -4.291940000 | -3.874546000 | 3.692582000  |
| H | -5.307048000 | -3.876873000 | 2.243190000  |
| C | -1.051237000 | 2.651712000  | -3.005432000 |
| H | -1.210285000 | 1.570065000  | -2.988603000 |
| H | -1.860832000 | 3.101047000  | -2.424212000 |
| H | -1.144415000 | 2.991388000  | -4.037382000 |
| H | 0.069000000  | -1.326249000 | 0.190907000  |
| C | 0.288132000  | -0.985171000 | -1.909605000 |
| C | -0.643944000 | -1.821024000 | -2.444805000 |
| O | 0.973750000  | -0.368391000 | -2.896399000 |
| C | -0.526259000 | -1.699050000 | -3.857967000 |
| H | -1.320131000 | -2.453048000 | -1.890377000 |
| C | 0.470058000  | -0.803499000 | -4.067670000 |
| H | -1.094829000 | -2.214589000 | -4.615512000 |
| H | 0.921542000  | -0.396303000 | -4.957357000 |
| C | 3.397829000  | -1.507029000 | 2.649172000  |
| H | 4.332815000  | -1.083912000 | 2.257443000  |
| H | 3.506750000  | -1.614426000 | 3.731348000  |

|   |              |              |              |
|---|--------------|--------------|--------------|
| H | 3.277513000  | -2.511860000 | 2.221342000  |
| C | -1.239081000 | 4.560028000  | 0.414150000  |
| H | -2.028105000 | 4.986325000  | 1.033572000  |
| H | -0.280411000 | 4.939309000  | 0.777824000  |
| H | -1.365915000 | 4.935887000  | -0.604791000 |
| C | -3.272278000 | 2.502348000  | 2.021817000  |
| H | -4.193677000 | 2.050758000  | 1.643632000  |
| H | -3.103305000 | 2.096364000  | 3.022836000  |
| H | -3.436727000 | 3.575564000  | 2.117010000  |

**IMes<sup>Me</sup>-II**                      Etot = -1460.758821695180 a.u.

|   |              |              |              |
|---|--------------|--------------|--------------|
| C | -0.526325000 | -0.474165000 | -0.148083000 |
| C | -1.226153000 | -2.326322000 | -1.195087000 |
| C | 0.105643000  | -2.452903000 | -0.974523000 |
| N | -1.592626000 | -1.087574000 | -0.680473000 |
| N | 0.519220000  | -1.291655000 | -0.331719000 |
| C | 1.880103000  | -1.045335000 | 0.049772000  |
| C | 2.724975000  | -0.451715000 | -0.894308000 |
| C | 2.329353000  | -1.453673000 | 1.301307000  |
| C | 4.045527000  | -0.238355000 | -0.537920000 |
| C | 3.666278000  | -1.206700000 | 1.609511000  |
| C | 4.532070000  | -0.597764000 | 0.716943000  |
| H | 4.712267000  | 0.229398000  | -1.255847000 |
| H | 4.029278000  | -1.499151000 | 2.589824000  |
| C | -2.932829000 | -0.581989000 | -0.687487000 |
| C | -3.767752000 | -0.885104000 | 0.388389000  |
| C | -3.360410000 | 0.169036000  | -1.781039000 |
| C | -5.075114000 | -0.416975000 | 0.333586000  |
| C | -4.677177000 | 0.611670000  | -1.785537000 |
| C | -5.547668000 | 0.329763000  | -0.739181000 |
| H | -5.740580000 | -0.638970000 | 1.162008000  |
| H | -5.028577000 | 1.198371000  | -2.628674000 |
| C | -2.425405000 | 0.522351000  | -2.896672000 |
| H | -1.638103000 | 1.196758000  | -2.546286000 |
| H | -1.929922000 | -0.358749000 | -3.312689000 |
| H | -2.962249000 | 1.021799000  | -3.703233000 |
| C | -3.261880000 | -1.651164000 | 1.569710000  |
| H | -2.913262000 | -2.648488000 | 1.283423000  |
| H | -2.413261000 | -1.122835000 | 2.024355000  |
| H | -4.050069000 | -1.772048000 | 2.312957000  |
| C | 2.225190000  | -0.053720000 | -2.249467000 |
| H | 1.808531000  | -0.904902000 | -2.796299000 |
| H | 1.438606000  | 0.700355000  | -2.176613000 |
| H | 3.036870000  | 0.362342000  | -2.846304000 |
| C | 1.460330000  | -2.135989000 | 2.309953000  |

|   |              |              |              |
|---|--------------|--------------|--------------|
| H | 1.375484000  | -1.512345000 | 3.203689000  |
| H | 0.449251000  | -2.305663000 | 1.946423000  |
| H | 1.904165000  | -3.093212000 | 2.599593000  |
| C | 5.954217000  | -0.311276000 | 1.091873000  |
| H | 6.082340000  | 0.747087000  | 1.337999000  |
| H | 6.260934000  | -0.891701000 | 1.962960000  |
| H | 6.636844000  | -0.538058000 | 0.269766000  |
| C | -6.953246000 | 0.849192000  | -0.750560000 |
| H | -7.007121000 | 1.827126000  | -0.262355000 |
| H | -7.325444000 | 0.971300000  | -1.769162000 |
| H | -7.629351000 | 0.180379000  | -0.215251000 |
| C | -0.630220000 | 0.751539000  | 0.752980000  |
| O | -0.644659000 | 0.270902000  | 2.003077000  |
| H | 0.349457000  | 0.558444000  | 3.220326000  |
| C | 0.416821000  | 1.790505000  | 0.452221000  |
| C | 1.415176000  | 2.331615000  | 1.189095000  |
| O | 0.329375000  | 2.423205000  | -0.753816000 |
| C | 1.992738000  | 3.359578000  | 0.383056000  |
| H | 1.690650000  | 2.023200000  | 2.186636000  |
| C | 1.299166000  | 3.370808000  | -0.777449000 |
| H | 2.812910000  | 4.010931000  | 0.641322000  |
| H | 1.361339000  | 3.964647000  | -1.674559000 |
| O | 0.960886000  | 0.672188000  | 4.004608000  |
| C | 0.268260000  | 1.343405000  | 5.014509000  |
| H | 0.932067000  | 1.458925000  | 5.876728000  |
| H | -0.057843000 | 2.347633000  | 4.706078000  |
| H | -0.623734000 | 0.794497000  | 5.349400000  |
| H | -1.590173000 | 1.224213000  | 0.437214000  |
| C | -2.204533000 | -3.236920000 | -1.831876000 |
| H | -1.706435000 | -4.146076000 | -2.166376000 |
| H | -2.999621000 | -3.519982000 | -1.137260000 |
| H | -2.682891000 | -2.772591000 | -2.698260000 |
| C | 1.044328000  | -3.554734000 | -1.284059000 |
| H | 1.476929000  | -3.972465000 | -0.371467000 |
| H | 0.524592000  | -4.352986000 | -1.812545000 |
| H | 1.874000000  | -3.213423000 | -1.907925000 |

**IMes<sup>Me</sup>-TS2**

Etot = -1460.725189471182 a.u.

|   |              |              |              |
|---|--------------|--------------|--------------|
| C | -0.400885000 | -0.324617000 | 0.077970000  |
| C | -1.209026000 | -2.308142000 | -0.589454000 |
| C | 0.139849000  | -2.385109000 | -0.634672000 |
| N | -1.529816000 | -1.022470000 | -0.150949000 |
| N | 0.625294000  | -1.150378000 | -0.214151000 |
| C | 2.009824000  | -0.788255000 | -0.275375000 |
| C | 2.849581000  | -1.122713000 | 0.787474000  |

|   |              |              |              |
|---|--------------|--------------|--------------|
| C | 2.483331000  | -0.178228000 | -1.439551000 |
| C | 4.193773000  | -0.790510000 | 0.679009000  |
| C | 3.836876000  | 0.134743000  | -1.491857000 |
| C | 4.703155000  | -0.151481000 | -0.444922000 |
| H | 4.859986000  | -1.040335000 | 1.498953000  |
| H | 4.223007000  | 0.612553000  | -2.386819000 |
| C | -2.898006000 | -0.599963000 | -0.032991000 |
| C | -3.553661000 | -0.777833000 | 1.181507000  |
| C | -3.545035000 | -0.113555000 | -1.167921000 |
| C | -4.900687000 | -0.447862000 | 1.247657000  |
| C | -4.893465000 | 0.202917000  | -1.047796000 |
| C | -5.587144000 | 0.047158000  | 0.145601000  |
| H | -5.424757000 | -0.576243000 | 2.189899000  |
| H | -5.413850000 | 0.588171000  | -1.919318000 |
| C | -2.816517000 | 0.110020000  | -2.455076000 |
| H | -2.116059000 | 0.953920000  | -2.369616000 |
| H | -2.233230000 | -0.765968000 | -2.753386000 |
| H | -3.522439000 | 0.331831000  | -3.256290000 |
| C | -2.823481000 | -1.258015000 | 2.396451000  |
| H | -2.216951000 | -2.144572000 | 2.194260000  |
| H | -2.148426000 | -0.478963000 | 2.762475000  |
| H | -3.522716000 | -1.499274000 | 3.197389000  |
| C | 2.334742000  | -1.809666000 | 2.013938000  |
| H | 1.677122000  | -1.144068000 | 2.578266000  |
| H | 1.760044000  | -2.707596000 | 1.774429000  |
| H | 3.160722000  | -2.099863000 | 2.663518000  |
| C | 1.585942000  | 0.121002000  | -2.599202000 |
| H | 0.995204000  | -0.754936000 | -2.883437000 |
| H | 0.872640000  | 0.928899000  | -2.379843000 |
| H | 2.178206000  | 0.419828000  | -3.464548000 |
| C | 6.149441000  | 0.233329000  | -0.517744000 |
| H | 6.778632000  | -0.472367000 | 0.027867000  |
| H | 6.498594000  | 0.278323000  | -1.550622000 |
| H | 6.308275000  | 1.221889000  | -0.075710000 |
| C | -7.031706000 | 0.432533000  | 0.250251000  |
| H | -7.131379000 | 1.480176000  | 0.550653000  |
| H | -7.545309000 | 0.317480000  | -0.705882000 |
| H | -7.553333000 | -0.171551000 | 0.994906000  |
| C | -0.282899000 | 1.102216000  | 0.403328000  |
| O | -1.540938000 | 1.686445000  | 0.644935000  |
| C | 0.705998000  | 1.444916000  | 1.453717000  |
| H | -1.640493000 | 2.235290000  | -0.168285000 |
| C | 0.734725000  | 1.264553000  | 2.801998000  |
| O | 1.765151000  | 2.213413000  | 1.084798000  |
| C | 1.883002000  | 1.951989000  | 3.286748000  |
| H | 0.001828000  | 0.727508000  | 3.383531000  |



|   |              |              |              |
|---|--------------|--------------|--------------|
| C | 2.466987000  | 2.503261000  | 2.195478000  |
| H | 2.224422000  | 2.032052000  | 4.306616000  |
| H | 3.349237000  | 3.105790000  | 2.056015000  |
| H | -0.041991000 | 1.664325000  | -0.654488000 |
| O | -0.627391000 | 2.406669000  | -1.733365000 |
| C | -0.085657000 | 3.645287000  | -2.007494000 |
| H | 0.395811000  | 4.114821000  | -1.129077000 |
| H | 0.689870000  | 3.606837000  | -2.796449000 |
| H | -0.847386000 | 4.362963000  | -2.359949000 |
| C | -2.250692000 | -3.311171000 | -0.907161000 |
| H | -2.906265000 | -2.969206000 | -1.711613000 |
| H | -1.784055000 | -4.244811000 | -1.219190000 |
| H | -2.885704000 | -3.518565000 | -0.041958000 |
| C | 1.040619000  | -3.478755000 | -1.063705000 |
| H | 1.709239000  | -3.797776000 | -0.260383000 |
| H | 0.454998000  | -4.340989000 | -1.379922000 |
| H | 1.669759000  | -3.167684000 | -1.901762000 |

**IMes<sup>Me</sup>-III**

Etot = -1460.745928038013

|   |              |              |              |
|---|--------------|--------------|--------------|
| C | -0.392706000 | -0.351043000 | -0.121297000 |
| C | -1.168120000 | -2.306287000 | -0.990800000 |
| C | 0.169179000  | -2.315348000 | -1.122925000 |
| N | -1.526216000 | -1.102840000 | -0.366278000 |
| N | 0.659726000  | -1.103322000 | -0.603456000 |
| C | 2.035829000  | -0.932553000 | -0.277628000 |
| C | 2.927974000  | -0.538406000 | -1.277516000 |
| C | 2.473936000  | -1.230995000 | 1.014460000  |
| C | 4.274977000  | -0.440527000 | -0.955017000 |
| C | 3.830734000  | -1.103024000 | 1.291790000  |
| C | 4.745438000  | -0.707228000 | 0.325467000  |
| H | 4.976477000  | -0.137337000 | -1.726754000 |
| H | 4.181062000  | -1.335220000 | 2.293134000  |
| C | -2.863891000 | -0.612340000 | -0.368042000 |
| C | -3.739133000 | -0.985619000 | 0.653268000  |
| C | -3.283714000 | 0.194975000  | -1.428153000 |
| C | -5.050410000 | -0.527322000 | 0.591228000  |
| C | -4.600567000 | 0.639759000  | -1.438844000 |
| C | -5.499187000 | 0.291102000  | -0.437668000 |
| H | -5.740153000 | -0.817468000 | 1.378363000  |
| H | -4.935104000 | 1.264344000  | -2.262073000 |
| C | -2.342532000 | 0.567526000  | -2.532976000 |
| H | -1.523464000 | 1.190869000  | -2.163309000 |
| H | -1.884325000 | -0.317565000 | -2.983110000 |
| H | -2.865620000 | 1.116898000  | -3.316235000 |
| C | -3.286471000 | -1.817234000 | 1.812599000  |

|   |              |              |              |
|---|--------------|--------------|--------------|
| H | -2.605854000 | -2.613976000 | 1.509932000  |
| H | -2.749067000 | -1.206428000 | 2.543741000  |
| H | -4.141731000 | -2.266997000 | 2.319005000  |
| C | 2.452131000  | -0.187167000 | -2.653538000 |
| H | 1.901707000  | -1.002842000 | -3.126889000 |
| H | 1.777715000  | 0.670935000  | -2.612576000 |
| H | 3.295250000  | 0.067480000  | -3.296972000 |
| C | 1.524367000  | -1.696996000 | 2.073650000  |
| H | 0.876698000  | -0.888650000 | 2.423414000  |
| H | 0.866456000  | -2.486971000 | 1.701805000  |
| H | 2.070920000  | -2.085630000 | 2.933500000  |
| C | 6.198270000  | -0.550048000 | 0.658739000  |
| H | 6.417059000  | 0.478322000  | 0.963014000  |
| H | 6.491039000  | -1.203065000 | 1.482821000  |
| H | 6.831987000  | -0.777676000 | -0.200601000 |
| C | -6.909354000 | 0.799484000  | -0.457566000 |
| H | -6.991634000 | 1.743487000  | 0.090285000  |
| H | -7.252440000 | 0.983636000  | -1.477279000 |
| H | -7.594601000 | 0.091045000  | 0.011440000  |
| C | -0.374052000 | 0.867997000  | 0.520454000  |
| O | -1.482172000 | 1.148334000  | 1.327441000  |
| H | -1.303821000 | 0.624036000  | 3.086863000  |
| C | 0.630517000  | 1.881449000  | 0.552912000  |
| C | 0.798081000  | 2.936679000  | 1.416737000  |
| O | 1.537377000  | 1.982644000  | -0.454367000 |
| C | 1.879703000  | 3.708285000  | 0.905748000  |
| H | 0.231863000  | 3.116361000  | 2.315618000  |
| C | 2.298072000  | 3.085336000  | -0.217999000 |
| H | 2.299322000  | 4.607179000  | 1.329415000  |
| H | 3.089694000  | 3.272202000  | -0.923536000 |
| O | -1.198184000 | 0.180039000  | 3.943317000  |
| C | -0.616191000 | 1.075325000  | 4.854331000  |
| H | -0.504481000 | 0.554964000  | 5.807478000  |
| H | 0.378219000  | 1.411941000  | 4.533044000  |
| H | -1.241166000 | 1.962056000  | 5.027341000  |
| H | -1.932187000 | 1.934247000  | 0.997835000  |
| C | -2.188108000 | -3.296055000 | -1.405369000 |
| H | -1.708525000 | -4.146375000 | -1.888896000 |
| H | -2.765052000 | -3.670046000 | -0.554944000 |
| H | -2.904256000 | -2.864459000 | -2.110966000 |
| C | 1.077744000  | -3.375793000 | -1.615101000 |
| H | 1.782800000  | -3.689087000 | -0.839576000 |
| H | 0.498534000  | -4.247772000 | -1.917135000 |
| H | 1.672130000  | -3.052265000 | -2.473436000 |

**IMes<sup>Me</sup>-IV**

Etot = -1803.861918482877 a.u.

|   |              |              |              |
|---|--------------|--------------|--------------|
| C | 0.578519000  | -1.544947000 | -0.379160000 |
| C | -0.494965000 | 0.425033000  | -0.321087000 |
| C | 0.790662000  | 0.647413000  | 0.039498000  |
| N | -0.613679000 | -0.937109000 | -0.573410000 |
| N | 1.435171000  | -0.579705000 | 0.002564000  |
| C | 2.801684000  | -0.679604000 | 0.457738000  |
| C | 3.842873000  | -0.449267000 | -0.432436000 |
| C | 3.013013000  | -0.870334000 | 1.824931000  |
| C | 5.138578000  | -0.456315000 | 0.077013000  |
| C | 4.322723000  | -0.868593000 | 2.278397000  |
| C | 5.401109000  | -0.673802000 | 1.420602000  |
| H | 5.964515000  | -0.285763000 | -0.606556000 |
| H | 4.505454000  | -1.030580000 | 3.336203000  |
| C | -1.933352000 | -1.495444000 | -0.763701000 |
| C | -2.510738000 | -1.541310000 | -2.028218000 |
| C | -2.652003000 | -1.836758000 | 0.392824000  |
| C | -3.812097000 | -2.030414000 | -2.128432000 |
| C | -3.944706000 | -2.308930000 | 0.232864000  |
| C | -4.537082000 | -2.434766000 | -1.020452000 |
| H | -4.268254000 | -2.083324000 | -3.112048000 |
| H | -4.503502000 | -2.594040000 | 1.118453000  |
| C | -2.047742000 | -1.731344000 | 1.756897000  |
| H | -1.250592000 | -2.477074000 | 1.892419000  |
| H | -1.609541000 | -0.744155000 | 1.931997000  |
| H | -2.808021000 | -1.901805000 | 2.519034000  |
| C | -1.818376000 | -1.084633000 | -3.274239000 |
| H | -1.063821000 | -0.322049000 | -3.076772000 |
| H | -1.319697000 | -1.920549000 | -3.769775000 |
| H | -2.545205000 | -0.667972000 | -3.973397000 |
| C | 3.615619000  | -0.223668000 | -1.894242000 |
| H | 3.380892000  | -1.163277000 | -2.400729000 |
| H | 2.782522000  | 0.457992000  | -2.084759000 |
| H | 4.508322000  | 0.197487000  | -2.357527000 |
| C | 1.873770000  | -1.095434000 | 2.768483000  |
| H | 1.179394000  | -0.248855000 | 2.774362000  |
| H | 1.296387000  | -1.984185000 | 2.493286000  |
| H | 2.242162000  | -1.228410000 | 3.785594000  |
| C | 6.806616000  | -0.717563000 | 1.937522000  |
| H | 6.890927000  | -0.221114000 | 2.906529000  |
| H | 7.135113000  | -1.752344000 | 2.073577000  |
| H | 7.501469000  | -0.239297000 | 1.245622000  |
| C | -5.918572000 | -2.995398000 | -1.158157000 |
| H | -5.903428000 | -4.082844000 | -1.040093000 |
| H | -6.587765000 | -2.596663000 | -0.392778000 |
| H | -6.344489000 | -2.773757000 | -2.137574000 |

|   |              |              |              |
|---|--------------|--------------|--------------|
| C | 0.994521000  | -3.014704000 | -0.563044000 |
| O | 2.133902000  | -3.241588000 | 0.185027000  |
| C | 1.297022000  | -3.257630000 | -2.006687000 |
| C | -0.108543000 | -3.979899000 | 0.141319000  |
| H | 1.674744000  | -3.626713000 | 1.018263000  |
| C | 1.227670000  | -2.503498000 | -3.136530000 |
| O | 1.835901000  | -4.458995000 | -2.301962000 |
| O | 0.226104000  | -3.948073000 | 1.451863000  |
| H | -1.094243000 | -3.555442000 | -0.088368000 |
| C | -0.120960000 | -5.358953000 | -0.435504000 |
| C | 1.739655000  | -3.308575000 | -4.196637000 |
| H | 0.883195000  | -1.486619000 | -3.207869000 |
| C | 2.091460000  | -4.482665000 | -3.623217000 |
| C | 0.336369000  | -6.549579000 | 0.021236000  |
| O | -0.756002000 | -5.528694000 | -1.626018000 |
| H | 1.838079000  | -3.044472000 | -5.237402000 |
| H | 2.520033000  | -5.394981000 | -4.003223000 |
| C | -0.024116000 | -7.518104000 | -0.962259000 |
| H | 0.836791000  | -6.710240000 | 0.962463000  |
| C | -0.678242000 | -6.843359000 | -1.935979000 |
| H | 0.169401000  | -8.579076000 | -0.939643000 |
| H | -1.141362000 | -7.140901000 | -2.862420000 |
| H | 0.091102000  | -5.170437000 | 2.623437000  |
| O | 0.149197000  | -5.816843000 | 3.366834000  |
| C | 0.978896000  | -5.270046000 | 4.345402000  |
| H | 1.991590000  | -5.052076000 | 3.972942000  |
| H | 0.575259000  | -4.339181000 | 4.773847000  |
| H | 1.075505000  | -5.992659000 | 5.161013000  |
| C | -1.642259000 | 1.355188000  | -0.429316000 |
| H | -2.059503000 | 1.366720000  | -1.438852000 |
| H | -2.449749000 | 1.074726000  | 0.251104000  |
| H | -1.322025000 | 2.366387000  | -0.181997000 |
| C | 1.482323000  | 1.895619000  | 0.435142000  |
| H | 1.873718000  | 1.828860000  | 1.452857000  |
| H | 2.328787000  | 2.110925000  | -0.220819000 |
| H | 0.789632000  | 2.734760000  | 0.387980000  |

**IMes<sup>Me</sup>-V**

Etot= -1803.865982857098 a.u.

|   |              |              |              |
|---|--------------|--------------|--------------|
| C | 0.335663000  | -1.423905000 | -0.141960000 |
| C | -0.695210000 | 0.574924000  | -0.087244000 |
| C | 0.624035000  | 0.789983000  | 0.119664000  |
| N | -0.854778000 | -0.799142000 | -0.247594000 |
| N | 1.242097000  | -0.448751000 | 0.075601000  |
| C | 2.664357000  | -0.573062000 | 0.250039000  |
| C | 3.485524000  | -0.393589000 | -0.864021000 |

|   |              |              |              |
|---|--------------|--------------|--------------|
| C | 3.177820000  | -0.735790000 | 1.537931000  |
| C | 4.859213000  | -0.475762000 | -0.672641000 |
| C | 4.558023000  | -0.814832000 | 1.668996000  |
| C | 5.412796000  | -0.704863000 | 0.580183000  |
| H | 5.511778000  | -0.358361000 | -1.532195000 |
| H | 4.970705000  | -0.980492000 | 2.658510000  |
| C | -2.167989000 | -1.332712000 | -0.480569000 |
| C | -2.619485000 | -1.447040000 | -1.796396000 |
| C | -2.985924000 | -1.602482000 | 0.613707000  |
| C | -3.921174000 | -1.882585000 | -1.999377000 |
| C | -4.280850000 | -2.036740000 | 0.354649000  |
| C | -4.763876000 | -2.191851000 | -0.936855000 |
| H | -4.284814000 | -1.985817000 | -3.017007000 |
| H | -4.926430000 | -2.270073000 | 1.195354000  |
| C | -2.521056000 | -1.404089000 | 2.022146000  |
| H | -1.471141000 | -1.666423000 | 2.145560000  |
| H | -2.649133000 | -0.361982000 | 2.335275000  |
| H | -3.104305000 | -2.025308000 | 2.701536000  |
| C | -1.730186000 | -1.139546000 | -2.961817000 |
| H | -1.202286000 | -0.190423000 | -2.841263000 |
| H | -0.969024000 | -1.914720000 | -3.090669000 |
| H | -2.310209000 | -1.092573000 | -3.883448000 |
| C | 2.932626000  | -0.073755000 | -2.218982000 |
| H | 3.711889000  | -0.159882000 | -2.976229000 |
| H | 2.122867000  | -0.749332000 | -2.494464000 |
| H | 2.543138000  | 0.948835000  | -2.260347000 |
| C | 2.297464000  | -0.783267000 | 2.745732000  |
| H | 1.887248000  | 0.207954000  | 2.970257000  |
| H | 1.472893000  | -1.479802000 | 2.587717000  |
| H | 2.864259000  | -1.120788000 | 3.612268000  |
| C | 6.894038000  | -0.846530000 | 0.754796000  |
| H | 7.236368000  | -0.354924000 | 1.667707000  |
| H | 7.172228000  | -1.901946000 | 0.833177000  |
| H | 7.439146000  | -0.421661000 | -0.089663000 |
| C | -6.148882000 | -2.706311000 | -1.184056000 |
| H | -6.136052000 | -3.792066000 | -1.319433000 |
| H | -6.810748000 | -2.489055000 | -0.344325000 |
| H | -6.582013000 | -2.269971000 | -2.086091000 |
| C | 0.686557000  | -2.939943000 | -0.016063000 |
| O | 0.992192000  | -3.126625000 | 1.274578000  |
| C | 1.804067000  | -3.260998000 | -0.990147000 |
| C | -0.567603000 | -3.884270000 | -0.350416000 |
| H | -0.534957000 | -3.784569000 | 1.490513000  |
| C | 1.881480000  | -3.305779000 | -2.348246000 |
| O | 2.968054000  | -3.683356000 | -0.457432000 |
| O | -1.268985000 | -3.988569000 | 0.846855000  |

|   |              |              |              |
|---|--------------|--------------|--------------|
| H | -1.200803000 | -3.442494000 | -1.124788000 |
| C | -0.151831000 | -5.225709000 | -0.855010000 |
| C | 3.186731000  | -3.779755000 | -2.664284000 |
| H | 1.093012000  | -3.069963000 | -3.045210000 |
| C | 3.796431000  | -3.991770000 | -1.473993000 |
| C | 0.444872000  | -6.298034000 | -0.278167000 |
| O | -0.429279000 | -5.498797000 | -2.156636000 |
| H | 3.606652000  | -3.952839000 | -3.642471000 |
| H | 4.773993000  | -4.347407000 | -1.194490000 |
| C | 0.552093000  | -7.293694000 | -1.292824000 |
| H | 0.767907000  | -6.361593000 | 0.748066000  |
| C | 0.008338000  | -6.753536000 | -2.407832000 |
| H | 0.974358000  | -8.281963000 | -1.201761000 |
| H | -0.144712000 | -7.118735000 | -3.409712000 |
| H | 2.383625000  | -3.684555000 | 2.171732000  |
| O | 3.076804000  | -3.948546000 | 2.814851000  |
| C | 3.242577000  | -5.332884000 | 2.740376000  |
| H | 2.336939000  | -5.883942000 | 3.035930000  |
| H | 3.527007000  | -5.670822000 | 1.733539000  |
| H | 4.041967000  | -5.620957000 | 3.429016000  |
| C | -1.831151000 | 1.521991000  | -0.164102000 |
| H | -2.333725000 | 1.472145000  | -1.133249000 |
| H | -2.584539000 | 1.316095000  | 0.599566000  |
| H | -1.471289000 | 2.540097000  | -0.020301000 |
| C | 1.373828000  | 2.040936000  | 0.375149000  |
| H | 1.895863000  | 1.999817000  | 1.333697000  |
| H | 2.127592000  | 2.226913000  | -0.393083000 |
| H | 0.689604000  | 2.888243000  | 0.394383000  |

**VI...IMes<sup>Me</sup>-I(H)**

Etot = -1803.867930628404 a.u.

|   |              |              |              |
|---|--------------|--------------|--------------|
| C | -1.845449000 | 0.682538000  | -0.182153000 |
| C | -2.649840000 | 2.097433000  | -1.783842000 |
| C | -1.332377000 | 1.908407000  | -2.041202000 |
| N | -2.927482000 | 1.344821000  | -0.645456000 |
| N | -0.873310000 | 1.047819000  | -1.047558000 |
| C | 0.472822000  | 0.588324000  | -0.941430000 |
| C | 1.412437000  | 1.380880000  | -0.280517000 |
| C | 0.809040000  | -0.650436000 | -1.488413000 |
| C | 2.716852000  | 0.906581000  | -0.193567000 |
| C | 2.125169000  | -1.082478000 | -1.371576000 |
| C | 3.093821000  | -0.316419000 | -0.733962000 |
| H | 3.456776000  | 1.510967000  | 0.322505000  |
| H | 2.397988000  | -2.046195000 | -1.791436000 |
| C | -4.215122000 | 1.277571000  | -0.031366000 |
| C | -5.047365000 | 0.197827000  | -0.319458000 |

|   |              |              |              |
|---|--------------|--------------|--------------|
| C | -4.605409000 | 2.297818000  | 0.838283000  |
| C | -6.304894000 | 0.164944000  | 0.273590000  |
| C | -5.872605000 | 2.221176000  | 1.402158000  |
| C | -6.735981000 | 1.165125000  | 1.134011000  |
| H | -6.963157000 | -0.670538000 | 0.055192000  |
| H | -6.189444000 | 3.009545000  | 2.078619000  |
| C | -3.681538000 | 3.422286000  | 1.190859000  |
| H | -2.848721000 | 3.073950000  | 1.809684000  |
| H | -3.242542000 | 3.888934000  | 0.305899000  |
| H | -4.215010000 | 4.191820000  | 1.750251000  |
| C | -4.597537000 | -0.916326000 | -1.213468000 |
| H | -4.149265000 | -0.543070000 | -2.137359000 |
| H | -3.841046000 | -1.527320000 | -0.712593000 |
| H | -5.437318000 | -1.561217000 | -1.474777000 |
| C | 1.030481000  | 2.684423000  | 0.349805000  |
| H | 0.484739000  | 3.328789000  | -0.343398000 |
| H | 0.380374000  | 2.539091000  | 1.217854000  |
| H | 1.918988000  | 3.220957000  | 0.684517000  |
| C | -0.223113000 | -1.506376000 | -2.156122000 |
| H | -0.966960000 | -1.852569000 | -1.432931000 |
| H | -0.765656000 | -0.956321000 | -2.929185000 |
| H | 0.240283000  | -2.378788000 | -2.617794000 |
| C | 4.514870000  | -0.787281000 | -0.652311000 |
| H | 5.011922000  | -0.398106000 | 0.238259000  |
| H | 4.573260000  | -1.877156000 | -0.629435000 |
| H | 5.088965000  | -0.448805000 | -1.520570000 |
| C | -8.086307000 | 1.098434000  | 1.781749000  |
| H | -8.001827000 | 0.784288000  | 2.826511000  |
| H | -8.579391000 | 2.073139000  | 1.775994000  |
| H | -8.736518000 | 0.384358000  | 1.274024000  |
| H | -1.871803000 | -0.739547000 | 0.938603000  |
| O | -1.909972000 | -1.642721000 | 1.390098000  |
| C | -0.727760000 | -1.873065000 | 2.061461000  |
| C | -0.392710000 | -0.725852000 | 3.036373000  |
| H | 0.135750000  | -1.979299000 | 1.383093000  |
| C | -0.846759000 | -3.143771000 | 2.839199000  |
| O | -1.240474000 | 0.067332000  | 3.385095000  |
| C | 0.983444000  | -0.635210000 | 3.512670000  |
| C | -1.872653000 | -3.687534000 | 3.538081000  |
| O | 0.241421000  | -3.949941000 | 2.903655000  |
| C | 2.127124000  | -1.324393000 | 3.222121000  |
| O | 1.258041000  | 0.332839000  | 4.426660000  |
| C | -1.384209000 | -4.917289000 | 4.069309000  |
| H | -2.855594000 | -3.258210000 | 3.640262000  |
| C | -0.099990000 | -5.021998000 | 3.656937000  |
| C | 3.156061000  | -0.745969000 | 4.003457000  |

|   |              |              |              |
|---|--------------|--------------|--------------|
| H | 2.213910000  | -2.150005000 | 2.535396000  |
| C | 2.562784000  | 0.252534000  | 4.709729000  |
| H | -1.920535000 | -5.629673000 | 4.675772000  |
| H | 0.667711000  | -5.763998000 | 3.799549000  |
| H | 4.195418000  | -1.029638000 | 4.040506000  |
| H | 2.936727000  | 0.963390000  | 5.428956000  |
| O | -0.910612000 | 2.848838000  | 3.383143000  |
| C | -0.772330000 | 3.428598000  | 4.653177000  |
| H | -1.039634000 | 1.892400000  | 3.492301000  |
| H | -1.672534000 | 3.303714000  | 5.269046000  |
| H | 0.080473000  | 3.016127000  | 5.207852000  |
| H | -0.602801000 | 4.498643000  | 4.515859000  |
| C | -3.681427000 | 2.879214000  | -2.505113000 |
| H | -3.246007000 | 3.361517000  | -3.380413000 |
| H | -4.502599000 | 2.240701000  | -2.842575000 |
| H | -4.120200000 | 3.656644000  | -1.873970000 |
| C | -0.464344000 | 2.425103000  | -3.125242000 |
| H | 0.364481000  | 3.021993000  | -2.734383000 |
| H | -0.024948000 | 1.612516000  | -3.710822000 |
| H | -1.041256000 | 3.054846000  | -3.802599000 |

**[IPr<sup>Me</sup>H]<sup>+</sup>** Etot= -1238.129443953881 a.u. symmetry c1

|   |              |              |              |
|---|--------------|--------------|--------------|
| C | -1.837939000 | 0.562542000  | -0.315826000 |
| C | -2.594852000 | 2.158519000  | -1.647144000 |
| C | -1.274785000 | 1.963908000  | -1.931992000 |
| N | -2.915311000 | 1.268335000  | -0.633517000 |
| N | -0.831898000 | 0.960894000  | -1.083243000 |
| C | 0.501099000  | 0.424789000  | -1.023576000 |
| C | 1.418641000  | 1.025240000  | -0.155344000 |
| C | 0.812508000  | -0.672749000 | -1.832750000 |
| C | 2.697312000  | 0.477900000  | -0.107135000 |
| C | 2.106167000  | -1.178290000 | -1.743954000 |
| C | 3.037973000  | -0.610800000 | -0.891550000 |
| H | 3.435038000  | 0.910223000  | 0.559127000  |
| H | 2.385114000  | -2.032858000 | -2.349681000 |
| C | -4.203346000 | 1.116322000  | -0.012468000 |
| C | -5.104292000 | 0.202843000  | -0.569392000 |
| C | -4.489937000 | 1.886420000  | 1.119411000  |
| C | -6.338659000 | 0.066774000  | 0.058769000  |
| C | -5.739663000 | 1.709587000  | 1.705966000  |
| C | -6.653600000 | 0.810694000  | 1.183095000  |
| H | -7.061501000 | -0.636746000 | -0.338174000 |
| H | -5.997605000 | 2.283130000  | 2.588868000  |
| C | -3.500714000 | 2.856430000  | 1.727528000  |
| H | -2.636114000 | 2.932862000  | 1.063582000  |



|   |              |              |              |
|---|--------------|--------------|--------------|
| C | -4.775906000 | -0.641053000 | -1.781402000 |
| H | -3.821460000 | -0.301843000 | -2.191534000 |
| C | 1.065286000  | 2.199792000  | 0.730402000  |
| H | 0.065148000  | 2.548223000  | 0.461259000  |
| C | -0.194449000 | -1.328279000 | -2.752264000 |
| H | -1.100300000 | -0.717147000 | -2.766033000 |
| H | -1.787457000 | -0.205404000 | 0.439089000  |
| H | 4.039746000  | -1.022377000 | -0.836965000 |
| H | -7.620839000 | 0.687652000  | 1.657684000  |
| C | -0.580878000 | -2.711197000 | -2.228004000 |
| H | -1.340417000 | -3.159649000 | -2.873211000 |
| H | 0.286211000  | -3.376959000 | -2.212674000 |
| H | -0.983432000 | -2.654526000 | -1.213873000 |
| C | 0.316560000  | -1.413010000 | -4.188687000 |
| H | 1.195076000  | -2.058568000 | -4.262254000 |
| H | -0.459007000 | -1.832615000 | -4.833897000 |
| H | 0.585479000  | -0.427216000 | -4.575002000 |
| C | 2.022966000  | 3.372072000  | 0.529297000  |
| H | 1.702131000  | 4.221461000  | 1.137148000  |
| H | 3.040212000  | 3.111970000  | 0.831861000  |
| H | 2.049754000  | 3.690613000  | -0.515308000 |
| C | 1.024382000  | 1.773986000  | 2.197842000  |
| H | 0.312796000  | 0.960236000  | 2.356558000  |
| H | 2.008722000  | 1.434456000  | 2.531145000  |
| H | 0.726279000  | 2.616934000  | 2.826205000  |
| C | -3.000234000 | 2.339781000  | 3.076304000  |
| H | -3.822297000 | 2.265102000  | 3.793221000  |
| H | -2.543115000 | 1.352120000  | 2.979918000  |
| H | -2.253799000 | 3.023689000  | 3.487877000  |
| C | -4.090784000 | 4.258016000  | 1.866107000  |
| H | -4.439169000 | 4.640926000  | 0.904193000  |
| H | -4.933353000 | 4.268956000  | 2.561829000  |
| H | -3.332207000 | 4.943247000  | 2.251975000  |
| C | -5.822370000 | -0.487804000 | -2.882749000 |
| H | -5.522366000 | -1.063287000 | -3.761786000 |
| H | -6.798285000 | -0.858535000 | -2.560029000 |
| H | -5.937072000 | 0.556689000  | -3.181520000 |
| C | -4.611220000 | -2.108397000 | -1.385874000 |
| H | -5.546699000 | -2.510256000 | -0.987535000 |
| H | -4.330942000 | -2.704255000 | -2.258037000 |
| H | -3.837518000 | -2.231420000 | -0.624299000 |
| C | -0.387206000 | 2.618895000  | -2.917022000 |
| H | 0.452149000  | 3.115211000  | -2.424228000 |
| H | 0.020855000  | 1.892987000  | -3.624177000 |
| H | -0.945492000 | 3.366410000  | -3.478143000 |
| C | -3.584940000 | 3.092239000  | -2.225918000 |

|   |              |             |              |
|---|--------------|-------------|--------------|
| H | -3.113110000 | 3.700659000 | -2.995657000 |
| H | -4.420082000 | 2.552692000 | -2.678782000 |
| H | -3.991467000 | 3.759574000 | -1.462483000 |

**IPr<sup>Me</sup>-I(H)** Etot -1353.286521911816 a.u.

|   |              |              |              |
|---|--------------|--------------|--------------|
| C | -1.836155000 | 0.466305000  | -0.239030000 |
| C | -2.589776000 | 2.132131000  | -1.610393000 |
| C | -1.276894000 | 1.940023000  | -1.894158000 |
| N | -2.897069000 | 1.223409000  | -0.601949000 |
| N | -0.849688000 | 0.924640000  | -1.043848000 |
| C | 0.486099000  | 0.415084000  | -1.006479000 |
| C | 1.417106000  | 1.020373000  | -0.152353000 |
| C | 0.818225000  | -0.676009000 | -1.819245000 |
| C | 2.703701000  | 0.489597000  | -0.114073000 |
| C | 2.117860000  | -1.170413000 | -1.743822000 |
| C | 3.052596000  | -0.596450000 | -0.898931000 |
| H | 3.442590000  | 0.933387000  | 0.544222000  |
| H | 2.399937000  | -2.020350000 | -2.355490000 |
| C | -4.190563000 | 1.098638000  | -0.004599000 |
| C | -5.110529000 | 0.201065000  | -0.560623000 |
| C | -4.494921000 | 1.878708000  | 1.118325000  |
| C | -6.358972000 | 0.090744000  | 0.046076000  |
| C | -5.756364000 | 1.731519000  | 1.688950000  |
| C | -6.681120000 | 0.846904000  | 1.160201000  |
| H | -7.087741000 | -0.602392000 | -0.359669000 |
| H | -6.016037000 | 2.317434000  | 2.563814000  |
| C | -3.501169000 | 2.840246000  | 1.733750000  |
| H | -2.623019000 | 2.879749000  | 1.085525000  |
| C | -4.783798000 | -0.657918000 | -1.762784000 |
| H | -3.797219000 | -0.365409000 | -2.128677000 |
| C | 1.068416000  | 2.202003000  | 0.727523000  |
| H | 0.048018000  | 2.510462000  | 0.489860000  |
| C | -0.180895000 | -1.333546000 | -2.746798000 |
| H | -1.098899000 | -0.742052000 | -2.728912000 |
| H | -1.828790000 | -1.046872000 | 0.843395000  |
| O | -1.868184000 | -1.895773000 | 1.374694000  |
| C | -1.107660000 | -1.733254000 | 2.544863000  |
| H | -1.221294000 | -2.629309000 | 3.160390000  |
| H | -0.037090000 | -1.604334000 | 2.334548000  |
| H | -1.439107000 | -0.873091000 | 3.142059000  |
| H | 4.059491000  | -0.997085000 | -0.852662000 |
| H | -7.658282000 | 0.745527000  | 1.619925000  |
| C | -0.531099000 | -2.740874000 | -2.264472000 |
| H | -1.273749000 | -3.193235000 | -2.927293000 |
| H | 0.353359000  | -3.383955000 | -2.261291000 |

|   |              |              |              |
|---|--------------|--------------|--------------|
| H | -0.943695000 | -2.720908000 | -1.253323000 |
| C | 0.319038000  | -1.365595000 | -4.189778000 |
| H | 1.212413000  | -1.987550000 | -4.289145000 |
| H | -0.451097000 | -1.784703000 | -4.842423000 |
| H | 0.562954000  | -0.363682000 | -4.550972000 |
| C | 1.986087000  | 3.394740000  | 0.465478000  |
| H | 1.669102000  | 4.250003000  | 1.067767000  |
| H | 3.021182000  | 3.166256000  | 0.732527000  |
| H | 1.966854000  | 3.692521000  | -0.585451000 |
| C | 1.100025000  | 1.814733000  | 2.205301000  |
| H | 0.417279000  | 0.988522000  | 2.414452000  |
| H | 2.105568000  | 1.508778000  | 2.507264000  |
| H | 0.807123000  | 2.666601000  | 2.824749000  |
| C | -3.040738000 | 2.341820000  | 3.103203000  |
| H | -3.879338000 | 2.295888000  | 3.803687000  |
| H | -2.601295000 | 1.343968000  | 3.034923000  |
| H | -2.290203000 | 3.018350000  | 3.520621000  |
| C | -4.063408000 | 4.256461000  | 1.836353000  |
| H | -4.385587000 | 4.630547000  | 0.861741000  |
| H | -4.919713000 | 4.297510000  | 2.514476000  |
| H | -3.299227000 | 4.934142000  | 2.225481000  |
| C | -5.780491000 | -0.450116000 | -2.901045000 |
| H | -5.484341000 | -1.042533000 | -3.770570000 |
| H | -6.786369000 | -0.765221000 | -2.611450000 |
| H | -5.829035000 | 0.598447000  | -3.204281000 |
| C | -4.711737000 | -2.133287000 | -1.370314000 |
| H | -5.687041000 | -2.493362000 | -1.030807000 |
| H | -4.409339000 | -2.739703000 | -2.228186000 |
| H | -3.992637000 | -2.294353000 | -0.564172000 |
| C | -0.391030000 | 2.603366000  | -2.879366000 |
| H | 0.450495000  | 3.103623000  | -2.393143000 |
| H | 0.022040000  | 1.886249000  | -3.593666000 |
| H | -0.950446000 | 3.352717000  | -3.439086000 |
| C | -3.577093000 | 3.074661000  | -2.186736000 |
| H | -3.101789000 | 3.694480000  | -2.946745000 |
| H | -4.412529000 | 2.547030000  | -2.654632000 |
| H | -3.994102000 | 3.736456000  | -1.423130000 |

# **IPr<sup>Me</sup>-TS1**

Etot = -1696.375536100965 a.u.

|   |              |              |              |
|---|--------------|--------------|--------------|
| C | -2.311411000 | 2.294536000  | 1.047653000  |
| C | -1.447723000 | 3.119518000  | 0.407562000  |
| N | -1.878999000 | 0.998754000  | 0.774254000  |
| C | -0.784520000 | 0.982287000  | -0.018835000 |
| N | -0.519481000 | 2.292680000  | -0.224357000 |
| H | 2.683095000  | -1.204072000 | 1.777732000  |

|   |              |              |              |
|---|--------------|--------------|--------------|
| O | 3.365344000  | -1.572026000 | 2.369670000  |
| C | 0.600611000  | -0.834608000 | -0.087408000 |
| O | 1.603726000  | -0.491531000 | 0.557236000  |
| C | 0.500356000  | 2.781587000  | -1.106948000 |
| C | 1.747215000  | 3.161878000  | -0.590407000 |
| C | 0.194527000  | 2.897420000  | -2.471221000 |
| C | 2.708370000  | 3.617407000  | -1.490005000 |
| C | 1.192536000  | 3.355295000  | -3.326719000 |
| C | 2.441807000  | 3.705195000  | -2.844917000 |
| H | 3.683283000  | 3.912267000  | -1.118088000 |
| H | 0.983160000  | 3.445768000  | -4.386931000 |
| C | -2.576389000 | -0.173814000 | 1.216091000  |
| C | -3.603402000 | -0.686230000 | 0.409854000  |
| C | -2.236596000 | -0.753536000 | 2.446277000  |
| C | -4.265631000 | -1.829232000 | 0.849285000  |
| C | -2.933885000 | -1.892635000 | 2.841049000  |
| C | -3.933828000 | -2.431361000 | 2.050590000  |
| H | -5.057244000 | -2.251432000 | 0.240143000  |
| H | -2.687392000 | -2.364034000 | 3.785943000  |
| C | 2.084327000  | 3.131928000  | 0.886070000  |
| H | 1.237881000  | 2.691963000  | 1.419183000  |
| C | -1.163551000 | -0.194173000 | 3.356361000  |
| H | -0.707975000 | 0.664701000  | 2.858043000  |
| C | -4.023185000 | -0.045159000 | -0.896525000 |
| H | -3.428145000 | 0.859222000  | -1.038263000 |
| C | -1.172551000 | 2.577548000  | -3.039382000 |
| H | -1.819706000 | 2.266869000  | -2.217085000 |
| H | -0.240858000 | -1.354067000 | 0.390093000  |
| C | 0.698503000  | -1.138916000 | -1.518205000 |
| C | 0.039014000  | -2.051039000 | -2.284252000 |
| O | 1.708759000  | -0.583925000 | -2.232348000 |
| C | 0.681445000  | -2.049954000 | -3.554249000 |
| H | -0.791175000 | -2.663399000 | -1.967738000 |
| C | 1.681634000  | -1.138786000 | -3.463057000 |
| H | 0.434957000  | -2.646840000 | -4.418549000 |
| H | 2.425400000  | -0.785745000 | -4.159618000 |
| C | 4.410882000  | -2.076684000 | 1.569163000  |
| H | 4.877359000  | -1.294188000 | 0.957946000  |
| H | 5.173868000  | -2.489596000 | 2.232029000  |
| H | 4.070303000  | -2.877410000 | 0.901207000  |
| H | 3.207408000  | 4.059159000  | -3.526796000 |
| H | -4.461789000 | -3.321355000 | 2.375415000  |
| C | 3.316909000  | 2.276544000  | 1.175182000  |
| H | 3.495706000  | 2.236548000  | 2.253111000  |
| H | 3.183397000  | 1.257983000  | 0.811396000  |
| H | 4.208417000  | 2.704120000  | 0.708795000  |

|   |              |              |              |
|---|--------------|--------------|--------------|
| C | 2.305608000  | 4.546307000  | 1.425522000  |
| H | 1.450728000  | 5.198135000  | 1.238092000  |
| H | 2.479422000  | 4.513028000  | 2.504137000  |
| H | 3.182815000  | 5.003171000  | 0.959194000  |
| C | -1.756342000 | 0.288800000  | 4.680401000  |
| H | -2.539518000 | 1.034215000  | 4.529026000  |
| H | -2.189053000 | -0.544725000 | 5.240204000  |
| H | -0.974681000 | 0.737067000  | 5.299055000  |
| C | -0.061726000 | -1.217959000 | 3.622348000  |
| H | -0.453353000 | -2.085693000 | 4.159655000  |
| H | 0.396561000  | -1.565267000 | 2.695391000  |
| H | 0.722246000  | -0.770897000 | 4.238993000  |
| C | -5.494415000 | 0.368859000  | -0.871812000 |
| H | -5.751179000 | 0.886271000  | -1.799712000 |
| H | -6.149125000 | -0.502102000 | -0.784176000 |
| H | -5.712450000 | 1.039499000  | -0.037759000 |
| C | -3.753105000 | -0.966861000 | -2.083766000 |
| H | -2.696624000 | -1.232042000 | -2.149272000 |
| H | -4.332247000 | -1.890743000 | -2.002129000 |
| H | -4.038998000 | -0.472808000 | -3.015985000 |
| C | -1.114629000 | 1.426551000  | -4.040561000 |
| H | -0.488680000 | 1.683081000  | -4.899625000 |
| H | -0.711049000 | 0.520134000  | -3.585864000 |
| H | -2.117709000 | 1.203012000  | -4.413326000 |
| C | -1.806445000 | 3.811112000  | -3.682675000 |
| H | -1.226166000 | 4.148071000  | -4.545717000 |
| H | -2.815212000 | 3.574038000  | -4.030601000 |
| H | -1.876522000 | 4.642565000  | -2.977752000 |
| C | -1.423533000 | 4.598754000  | 0.328560000  |
| H | -0.643123000 | 5.028734000  | 0.960662000  |
| H | -1.245407000 | 4.941025000  | -0.692768000 |
| H | -2.379712000 | 5.003435000  | 0.660339000  |
| C | -3.493003000 | 2.606537000  | 1.884619000  |
| H | -4.375136000 | 2.051329000  | 1.559197000  |
| H | -3.321516000 | 2.361563000  | 2.935628000  |
| H | -3.719719000 | 3.670763000  | 1.823109000  |

**IPr<sup>Me</sup>-II**

Etot = -1696.394063474064 a.u.

|   |                 |                 |                 |
|---|-----------------|-----------------|-----------------|
| C | -0.323380000000 | -0.503751000000 | 0.037727000000  |
| C | -1.180746000000 | -2.224402000000 | -1.105244000000 |
| C | 0.154264000000  | -2.433109000000 | -0.981530000000 |
| N | -1.453511000000 | -1.024767000000 | -0.466978000000 |
| N | 0.667326000000  | -1.354557000000 | -0.273907000000 |
| C | 2.068622000000  | -1.197973000000 | 0.017492000000  |
| C | 2.880529000000  | -0.586307000000 | -0.947943000000 |

|   |                 |                 |                 |
|---|-----------------|-----------------|-----------------|
| C | 2.578998000000  | -1.741186000000 | 1.203656000000  |
| C | 4.240565000000  | -0.485350000000 | -0.669904000000 |
| C | 3.946070000000  | -1.605771000000 | 1.430191000000  |
| C | 4.768332000000  | -0.979682000000 | 0.509913000000  |
| H | 4.897011000000  | -0.016588000000 | -1.393726000000 |
| H | 4.374487000000  | -2.011063000000 | 2.339634000000  |
| C | -2.771087000000 | -0.453669000000 | -0.373505000000 |
| C | -3.598229000000 | -0.847382000000 | 0.686472000000  |
| C | -3.196986000000 | 0.419138000000  | -1.384502000000 |
| C | -4.887161000000 | -0.322401000000 | 0.721355000000  |
| C | -4.496637000000 | 0.909705000000  | -1.299313000000 |
| C | -5.333636000000 | 0.546219000000  | -0.258517000000 |
| H | -5.552890000000 | -0.605892000000 | 1.528559000000  |
| H | -4.860419000000 | 1.584165000000  | -2.065655000000 |
| C | -2.327634000000 | 0.811248000000  | -2.560925000000 |
| H | -1.302393000000 | 0.495363000000  | -2.353041000000 |
| C | -3.166119000000 | -1.821057000000 | 1.762263000000  |
| H | -2.108655000000 | -2.051896000000 | 1.614507000000  |
| C | 2.355025000000  | -0.082521000000 | -2.276530000000 |
| H | 1.263185000000  | -0.063892000000 | -2.231234000000 |
| C | 1.735424000000  | -2.512403000000 | 2.195885000000  |
| H | 0.686782000000  | -2.371851000000 | 1.929011000000  |
| C | -0.300330000000 | 0.687966000000  | 0.987445000000  |
| O | -0.045824000000 | 0.237934000000  | 2.235331000000  |
| H | -0.482975000000 | 1.177944000000  | 3.381539000000  |
| C | 0.611172000000  | 1.819829000000  | 0.578782000000  |
| C | 1.685728000000  | 2.375570000000  | 1.193535000000  |
| O | 0.229042000000  | 2.601168000000  | -0.466116000000 |
| C | 1.988636000000  | 3.574387000000  | 0.478422000000  |
| H | 2.182326000000  | 1.985536000000  | 2.067199000000  |
| C | 1.073462000000  | 3.661062000000  | -0.514873000000 |
| H | 2.781581000000  | 4.278385000000  | 0.679805000000  |
| H | 0.899911000000  | 4.372205000000  | -1.306634000000 |
| O | -0.737309000000 | 1.749985000000  | 4.184030000000  |
| C | -1.654792000000 | 2.724951000000  | 3.767926000000  |
| H | -1.900465000000 | 3.368797000000  | 4.617775000000  |
| H | -1.253056000000 | 3.367122000000  | 2.970712000000  |
| H | -2.595278000000 | 2.288295000000  | 3.401016000000  |
| H | -1.321385000000 | 1.111127000000  | 0.859062000000  |
| C | 1.906990000000  | -2.003885000000 | 3.624099000000  |
| H | 1.246811000000  | -2.561257000000 | 4.294088000000  |
| H | 2.930394000000  | -2.143436000000 | 3.981791000000  |
| H | 1.646159000000  | -0.947336000000 | 3.686366000000  |
| C | 2.060012000000  | -4.006095000000 | 2.125947000000  |
| H | 1.409899000000  | -4.562006000000 | 2.806624000000  |
| H | 1.923288000000  | -4.408682000000 | 1.120695000000  |

|   |                 |                 |                 |
|---|-----------------|-----------------|-----------------|
| H | 3.095770000000  | -4.191013000000 | 2.424555000000  |
| C | -3.312197000000 | -1.222738000000 | 3.160155000000  |
| H | -4.357986000000 | -1.005950000000 | 3.391921000000  |
| H | -2.947275000000 | -1.933589000000 | 3.905957000000  |
| H | -2.736871000000 | -0.300735000000 | 3.260040000000  |
| C | -3.951930000000 | -3.129107000000 | 1.662390000000  |
| H | -3.591072000000 | -3.839585000000 | 2.410370000000  |
| H | -5.015762000000 | -2.957687000000 | 1.847503000000  |
| H | -3.850933000000 | -3.589624000000 | 0.677877000000  |
| C | -2.304643000000 | 2.321815000000  | -2.783059000000 |
| H | -3.283681000000 | 2.694952000000  | -3.093115000000 |
| H | -2.001972000000 | 2.853877000000  | -1.880254000000 |
| H | -1.593939000000 | 2.565458000000  | -3.576732000000 |
| C | -2.785161000000 | 0.097930000000  | -3.834497000000 |
| H | -2.766519000000 | -0.987756000000 | -3.722370000000 |
| H | -3.805041000000 | 0.393850000000  | -4.095496000000 |
| H | -2.131833000000 | 0.365464000000  | -4.668883000000 |
| C | 2.761626000000  | -1.020166000000 | -3.415397000000 |
| H | 3.850515000000  | -1.055769000000 | -3.510072000000 |
| H | 2.403029000000  | -2.038540000000 | -3.260918000000 |
| H | 2.353044000000  | -0.656129000000 | -4.361608000000 |
| C | 2.825799000000  | 1.335201000000  | -2.588360000000 |
| H | 2.599006000000  | 2.025184000000  | -1.775045000000 |
| H | 3.902954000000  | 1.365345000000  | -2.770880000000 |
| H | 2.330340000000  | 1.696542000000  | -3.493096000000 |
| H | -6.342933000000 | 0.940348000000  | -0.213417000000 |
| H | 5.830803000000  | -0.888199000000 | 0.707594000000  |
| C | -2.197181000000 | -3.081188000000 | -1.759764000000 |
| H | -1.861579000000 | -3.371357000000 | -2.757689000000 |
| H | -2.363192000000 | -3.997595000000 | -1.187336000000 |
| H | -3.151675000000 | -2.564888000000 | -1.854218000000 |
| C | 0.953078000000  | -3.584741000000 | -1.462904000000 |
| H | 2.018663000000  | -3.427478000000 | -1.302480000000 |
| H | 0.662069000000  | -4.499591000000 | -0.940558000000 |
| H | 0.784646000000  | -3.747465000000 | -2.529835000000 |

# **IPr<sup>Me</sup>-TS2**

Etot = -1696.366087407709 a.u.

|   |              |              |              |
|---|--------------|--------------|--------------|
| C | -0.392676000 | -0.236797000 | -0.124162000 |
| C | -1.176665000 | -2.239760000 | -0.792734000 |
| C | 0.169988000  | -2.292626000 | -0.853588000 |
| N | -1.515718000 | -0.961892000 | -0.345845000 |
| N | 0.643972000  | -1.051181000 | -0.431938000 |
| C | 2.055634000  | -0.791011000 | -0.349457000 |
| C | 2.749441000  | -1.228632000 | 0.788494000  |
| C | 2.702128000  | -0.210233000 | -1.447975000 |

|   |              |              |              |
|---|--------------|--------------|--------------|
| C | 4.126242000  | -1.027726000 | 0.818044000  |
| C | 4.081159000  | -0.040120000 | -1.365878000 |
| C | 4.787557000  | -0.436863000 | -0.244313000 |
| H | 4.689662000  | -1.346994000 | 1.687684000  |
| H | 4.610494000  | 0.407370000  | -2.199508000 |
| C | -2.894859000 | -0.639354000 | -0.077465000 |
| C | -3.387144000 | -0.852003000 | 1.216326000  |
| C | -3.718705000 | -0.245731000 | -1.138315000 |
| C | -4.740869000 | -0.622016000 | 1.438593000  |
| C | -5.064593000 | -0.021772000 | -0.857800000 |
| C | -5.574259000 | -0.203922000 | 0.415254000  |
| H | -5.148126000 | -0.774331000 | 2.431971000  |
| H | -5.724990000 | 0.298236000  | -1.655978000 |
| C | -3.223110000 | -0.042844000 | -2.555677000 |
| H | -2.172644000 | -0.342516000 | -2.599518000 |
| C | -2.519515000 | -1.314030000 | 2.367819000  |
| H | -1.485713000 | -1.373181000 | 2.020262000  |
| C | 2.081651000  | -1.909150000 | 1.967184000  |
| H | 1.018473000  | -2.023633000 | 1.742327000  |
| C | 1.982599000  | 0.217401000  | -2.710248000 |
| H | 0.908105000  | 0.094874000  | -2.554292000 |
| C | -0.343184000 | 1.192591000  | 0.229560000  |
| O | -1.629633000 | 1.653937000  | 0.595357000  |
| C | 0.655204000  | 1.684269000  | 1.216464000  |
| H | -1.781252000 | 2.354311000  | -0.070464000 |
| C | 0.507726000  | 2.142012000  | 2.490640000  |
| O | 1.914494000  | 1.960701000  | 0.786775000  |
| C | 1.755381000  | 2.720184000  | 2.867389000  |
| H | -0.391308000 | 2.088343000  | 3.082602000  |
| C | 2.572626000  | 2.574700000  | 1.798003000  |
| H | 2.010272000  | 3.176928000  | 3.811514000  |
| H | 3.601862000  | 2.832702000  | 1.606949000  |
| H | -0.217108000 | 1.949468000  | -0.804252000 |
| O | -0.664645000 | 2.978366000  | -1.542327000 |
| C | -0.059986000 | 4.167954000  | -1.169502000 |
| H | 0.262649000  | 4.178091000  | -0.112389000 |
| H | 0.841062000  | 4.398704000  | -1.766954000 |
| H | -0.741002000 | 5.027771000  | -1.289185000 |
| C | -2.924656000 | -2.707569000 | 2.848331000  |
| H | -2.267576000 | -3.030300000 | 3.660103000  |
| H | -3.950237000 | -2.706133000 | 3.227318000  |
| H | -2.861656000 | -3.446852000 | 2.046903000  |
| C | -2.556825000 | -0.321602000 | 3.528448000  |
| H | -1.856280000 | -0.630583000 | 4.308498000  |
| H | -2.285570000 | 0.681984000  | 3.197919000  |
| H | -3.553306000 | -0.275487000 | 3.975375000  |



|   |              |              |              |
|---|--------------|--------------|--------------|
| C | -3.306242000 | 1.427329000  | -2.966671000 |
| H | -4.340128000 | 1.781198000  | -2.923142000 |
| H | -2.686474000 | 2.062520000  | -2.331114000 |
| H | -2.958500000 | 1.543063000  | -3.997239000 |
| C | -3.998285000 | -0.899627000 | -3.557594000 |
| H | -5.040730000 | -0.577942000 | -3.624804000 |
| H | -3.556350000 | -0.797601000 | -4.551857000 |
| H | -3.992730000 | -1.958027000 | -3.290659000 |
| C | 2.238972000  | 1.687669000  | -3.035120000 |
| H | 1.939785000  | 2.336847000  | -2.211801000 |
| H | 3.294982000  | 1.864451000  | -3.254528000 |
| H | 1.663182000  | 1.977233000  | -3.917830000 |
| C | 2.658969000  | -3.301840000 | 2.223800000  |
| H | 2.111764000  | -3.783845000 | 3.037772000  |
| H | 2.596101000  | -3.948207000 | 1.346813000  |
| H | 3.709168000  | -3.240647000 | 2.520251000  |
| C | 2.200026000  | -1.069511000 | 3.238105000  |
| H | 1.779510000  | -0.072641000 | 3.102191000  |
| H | 1.667915000  | -1.559523000 | 4.057904000  |
| H | 3.246768000  | -0.963133000 | 3.535777000  |
| H | -6.626429000 | -0.026744000 | 0.609505000  |
| H | 5.861740000  | -0.293325000 | -0.201641000 |
| C | 2.385281000  | -0.654332000 | -3.900600000 |
| H | 3.451232000  | -0.544997000 | -4.118072000 |
| H | 2.185162000  | -1.712232000 | -3.721518000 |
| H | 1.828158000  | -0.350308000 | -4.790423000 |
| C | -2.182320000 | -3.280772000 | -1.102071000 |
| H | -2.737419000 | -3.053002000 | -2.013964000 |
| H | -1.683391000 | -4.238410000 | -1.244042000 |
| H | -2.907342000 | -3.390004000 | -0.293496000 |
| C | 1.060634000  | -3.389413000 | -1.292831000 |
| H | 1.803985000  | -3.640467000 | -0.535848000 |
| H | 0.468982000  | -4.280643000 | -1.496690000 |
| H | 1.600043000  | -3.127466000 | -2.205567000 |

**IPr<sup>Me</sup>-III** = Etot = -1696.394068184376 a.u.

|   |              |              |              |
|---|--------------|--------------|--------------|
| C | -0.300112000 | -0.475087000 | -0.006785000 |
| C | -1.151414000 | -2.363931000 | -0.955301000 |
| C | 0.182854000  | -2.412488000 | -1.101047000 |
| N | -1.462756000 | -1.177263000 | -0.273167000 |
| N | 0.718805000  | -1.241388000 | -0.535858000 |
| C | 2.122114000  | -1.055826000 | -0.359444000 |
| C | 2.906119000  | -0.687749000 | -1.465366000 |
| C | 2.687542000  | -1.291890000 | 0.901476000  |
| C | 4.271894000  | -0.514535000 | -1.264668000 |

|   |              |              |              |
|---|--------------|--------------|--------------|
| C | 4.057556000  | -1.092578000 | 1.051402000  |
| C | 4.844021000  | -0.698981000 | -0.017071000 |
| H | 4.898567000  | -0.220821000 | -2.099475000 |
| H | 4.516568000  | -1.265578000 | 2.018725000  |
| C | -2.779671000 | -0.619622000 | -0.285191000 |
| C | -3.718744000 | -1.041253000 | 0.667981000  |
| C | -3.112284000 | 0.304265000  | -1.287005000 |
| C | -4.993161000 | -0.484010000 | 0.620540000  |
| C | -4.398108000 | 0.839742000  | -1.285111000 |
| C | -5.331205000 | 0.456254000  | -0.338058000 |
| H | -5.732714000 | -0.788014000 | 1.353168000  |
| H | -4.674342000 | 1.560378000  | -2.047384000 |
| C | -2.146772000 | 0.715195000  | -2.378505000 |
| H | -1.203925000 | 0.189176000  | -2.218889000 |
| C | -3.397059000 | -2.053355000 | 1.747214000  |
| H | -2.394058000 | -2.441176000 | 1.553948000  |
| C | 2.330699000  | -0.461816000 | -2.850726000 |
| H | 1.294909000  | -0.808928000 | -2.847669000 |
| C | 1.882990000  | -1.802337000 | 2.078063000  |
| H | 0.831771000  | -1.826647000 | 1.786909000  |
| C | -0.251739000 | 0.711265000  | 0.708321000  |
| O | -1.365827000 | 0.982391000  | 1.510645000  |
| H | -1.150873000 | 1.200335000  | 3.359160000  |
| C | 0.748721000  | 1.723800000  | 0.796694000  |
| C | 0.838893000  | 2.802878000  | 1.649920000  |
| O | 1.762014000  | 1.789317000  | -0.103956000 |
| C | 1.982090000  | 3.547805000  | 1.239121000  |
| H | 0.181185000  | 3.020640000  | 2.475097000  |
| C | 2.511408000  | 2.893384000  | 0.180397000  |
| H | 2.364892000  | 4.454455000  | 1.683406000  |
| H | 3.369298000  | 3.056498000  | -0.450950000 |
| O | -1.078797000 | 1.316373000  | 4.322603000  |
| C | -2.058411000 | 2.249509000  | 4.725729000  |
| H | -1.961250000 | 2.392700000  | 5.803297000  |
| H | -1.924115000 | 3.222580000  | 4.237593000  |
| H | -3.075076000 | 1.894739000  | 4.517403000  |
| H | -1.875708000 | 1.709558000  | 1.129639000  |
| H | -6.328226000 | 0.883099000  | -0.353066000 |
| H | 5.909843000  | -0.550097000 | 0.118691000  |
| C | 2.296151000  | -3.231226000 | 2.432855000  |
| H | 1.676708000  | -3.610982000 | 3.249777000  |
| H | 2.183499000  | -3.903229000 | 1.578754000  |
| H | 3.339789000  | -3.268264000 | 2.757085000  |
| C | 2.001314000  | -0.890251000 | 3.296668000  |
| H | 1.697944000  | 0.130996000  | 3.057034000  |
| H | 1.361123000  | -1.257249000 | 4.103168000  |

|   |              |              |              |
|---|--------------|--------------|--------------|
| H | 3.026990000  | -0.863503000 | 3.674276000  |
| C | -3.385767000 | -1.404595000 | 3.130810000  |
| H | -4.375688000 | -1.012961000 | 3.381957000  |
| H | -3.115462000 | -2.143469000 | 3.890186000  |
| H | -2.670623000 | -0.583379000 | 3.178918000  |
| C | -4.372254000 | -3.230416000 | 1.737374000  |
| H | -4.435773000 | -3.704692000 | 0.755892000  |
| H | -4.052706000 | -3.985237000 | 2.460452000  |
| H | -5.378784000 | -2.909376000 | 2.018346000  |
| C | -2.668019000 | 0.304018000  | -3.755310000 |
| H | -2.858597000 | -0.770870000 | -3.802483000 |
| H | -3.598546000 | 0.824001000  | -3.998093000 |
| H | -1.933775000 | 0.554782000  | -4.525387000 |
| C | -1.851640000 | 2.213093000  | -2.335597000 |
| H | -1.118997000 | 2.475653000  | -3.103198000 |
| H | -2.755784000 | 2.798782000  | -2.522205000 |
| H | -1.447642000 | 2.509162000  | -1.364501000 |
| C | 3.088318000  | -1.250293000 | -3.919855000 |
| H | 2.571753000  | -1.164995000 | -4.879191000 |
| H | 4.100098000  | -0.859850000 | -4.056091000 |
| H | 3.171977000  | -2.310417000 | -3.670943000 |
| C | 2.314461000  | 1.019339000  | -3.230153000 |
| H | 1.715029000  | 1.605061000  | -2.534396000 |
| H | 3.329143000  | 1.428062000  | -3.233851000 |
| H | 1.900917000  | 1.140435000  | -4.235112000 |
| C | 1.039558000  | -3.487038000 | -1.650585000 |
| H | 1.779642000  | -3.819725000 | -0.917078000 |
| H | 0.422983000  | -4.344055000 | -1.919213000 |
| H | 1.583451000  | -3.171727000 | -2.543013000 |
| C | -2.194673000 | -3.311048000 | -1.407421000 |
| H | -1.740482000 | -4.106200000 | -1.997340000 |
| H | -2.722076000 | -3.771902000 | -0.569030000 |
| H | -2.942414000 | -2.812727000 | -2.031326000 |

# **IPr<sup>Me</sup>-IV**

Etot = -2039.505275248610 a.u.

|   |              |              |              |
|---|--------------|--------------|--------------|
| C | 0.648097000  | -1.603017000 | -0.316422000 |
| C | -0.482168000 | 0.333031000  | -0.346500000 |
| C | 0.803264000  | 0.612799000  | -0.023929000 |
| N | -0.570618000 | -1.041131000 | -0.516645000 |
| N | 1.487942000  | -0.590570000 | -0.007111000 |
| C | 2.869844000  | -0.613023000 | 0.437394000  |
| C | 3.892209000  | -0.349004000 | -0.477810000 |
| C | 3.109876000  | -0.741205000 | 1.814127000  |
| C | 5.190951000  | -0.244683000 | 0.019743000  |
| C | 4.422120000  | -0.618349000 | 2.253577000  |

|   |              |              |              |
|---|--------------|--------------|--------------|
| C | 5.458541000  | -0.374851000 | 1.368038000  |
| H | 6.003884000  | -0.046591000 | -0.669454000 |
| H | 4.635401000  | -0.712991000 | 3.311943000  |
| C | -1.883946000 | -1.652851000 | -0.635572000 |
| C | -2.497342000 | -1.770040000 | -1.888354000 |
| C | -2.562530000 | -1.963644000 | 0.558631000  |
| C | -3.778290000 | -2.319692000 | -1.929903000 |
| C | -3.843731000 | -2.491403000 | 0.453883000  |
| C | -4.443013000 | -2.688701000 | -0.778033000 |
| H | -4.267217000 | -2.437870000 | -2.889923000 |
| H | -4.384979000 | -2.746986000 | 1.356832000  |
| C | -1.991666000 | -1.710802000 | 1.939638000  |
| H | -0.921368000 | -1.519552000 | 1.841627000  |
| C | -1.896814000 | -1.280053000 | -3.186995000 |
| H | -0.905330000 | -0.878439000 | -2.975149000 |
| C | 3.677713000  | -0.168639000 | -1.964281000 |
| H | 2.616631000  | -0.303940000 | -2.180492000 |
| C | 2.017712000  | -0.990492000 | 2.831660000  |
| H | 1.107688000  | -1.263696000 | 2.295299000  |
| C | 1.119154000  | -3.061556000 | -0.477929000 |
| O | 2.247362000  | -3.258124000 | 0.298328000  |
| C | 1.465854000  | -3.297024000 | -1.917894000 |
| C | 0.047771000  | -4.137763000 | 0.162015000  |
| H | 1.793102000  | -3.815922000 | 1.057690000  |
| C | 1.343321000  | -2.590082000 | -3.069327000 |
| O | 2.092612000  | -4.472659000 | -2.176561000 |
| O | 0.529426000  | -4.424154000 | 1.399027000  |
| H | -0.925965000 | -3.635761000 | 0.175682000  |
| C | -0.130938000 | -5.370896000 | -0.667141000 |
| C | 1.908611000  | -3.389991000 | -4.105843000 |
| H | 0.921353000  | -1.606596000 | -3.180303000 |
| C | 2.347870000  | -4.518195000 | -3.503970000 |
| C | 0.205528000  | -6.669153000 | -0.459606000 |
| O | -0.809545000 | -5.256182000 | -1.837975000 |
| H | 1.985057000  | -3.146884000 | -5.154161000 |
| H | 2.848684000  | -5.404608000 | -3.859100000 |
| C | -0.282534000 | -7.399481000 | -1.586584000 |
| H | 0.733531000  | -7.054726000 | 0.397306000  |
| C | -0.886536000 | -6.493180000 | -2.389859000 |
| H | -0.198803000 | -8.459928000 | -1.769733000 |
| H | -1.401723000 | -6.561198000 | -3.334638000 |
| H | 0.011323000  | -5.626683000 | 2.379532000  |
| O | -0.255461000 | -6.326653000 | 3.035732000  |
| C | 0.305992000  | -5.995421000 | 4.280471000  |
| H | 1.402850000  | -5.948405000 | 4.244139000  |
| H | -0.059814000 | -5.031707000 | 4.660417000  |

|   |              |              |              |
|---|--------------|--------------|--------------|
| H | 0.028524000  | -6.766417000 | 5.003920000  |
| H | -5.440472000 | -3.109926000 | -0.835915000 |
| H | 6.475441000  | -0.282107000 | 1.733079000  |
| C | 2.354466000  | -2.151718000 | 3.764555000  |
| H | 1.496558000  | -2.369670000 | 4.405515000  |
| H | 2.600773000  | -3.056094000 | 3.205709000  |
| H | 3.198398000  | -1.910886000 | 4.415419000  |
| C | 1.719300000  | 0.268570000  | 3.646857000  |
| H | 1.414453000  | 1.103725000  | 3.013520000  |
| H | 0.913281000  | 0.071514000  | 4.358421000  |
| H | 2.601855000  | 0.578032000  | 4.213556000  |
| C | -2.152919000 | -2.906102000 | 2.875301000  |
| H | -3.204457000 | -3.107014000 | 3.092695000  |
| H | -1.698211000 | -3.805297000 | 2.458009000  |
| H | -1.658796000 | -2.689417000 | 3.825906000  |
| C | -2.631232000 | -0.470696000 | 2.568347000  |
| H | -2.190220000 | -0.283842000 | 3.550704000  |
| H | -2.490050000 | 0.422642000  | 1.958515000  |
| H | -3.705743000 | -0.622181000 | 2.703200000  |
| C | -1.762487000 | -2.405137000 | -4.211032000 |
| H | -1.249765000 | -2.038311000 | -5.103705000 |
| H | -1.196584000 | -3.247777000 | -3.813770000 |
| H | -2.747524000 | -2.765505000 | -4.518384000 |
| C | -2.731762000 | -0.142511000 | -3.779659000 |
| H | -3.725536000 | -0.497178000 | -4.064330000 |
| H | -2.856623000 | 0.683364000  | -3.078069000 |
| H | -2.243934000 | 0.243411000  | -4.678271000 |
| C | 4.455254000  | -1.218247000 | -2.756880000 |
| H | 4.192780000  | -2.230444000 | -2.445463000 |
| H | 4.233847000  | -1.123792000 | -3.822604000 |
| H | 5.532295000  | -1.085735000 | -2.625562000 |
| C | 4.074129000  | 1.233631000  | -2.426592000 |
| H | 3.858601000  | 1.348524000  | -3.491913000 |
| H | 3.532672000  | 2.010552000  | -1.884407000 |
| H | 5.143939000  | 1.405628000  | -2.282225000 |
| C | 1.411378000  | 1.935675000  | 0.248718000  |
| H | 0.690770000  | 2.571014000  | 0.765679000  |
| H | 2.304876000  | 1.851448000  | 0.865150000  |
| H | 1.688002000  | 2.439186000  | -0.680974000 |
| C | -1.606625000 | 1.280561000  | -0.524749000 |
| H | -1.566762000 | 1.746039000  | -1.512874000 |
| H | -2.573304000 | 0.790483000  | -0.420396000 |
| H | -1.540292000 | 2.077391000  | 0.217689000  |

**IPr<sup>Me</sup>-V**      Etot = -2039.508108591630 a.u.

|   |              |              |              |
|---|--------------|--------------|--------------|
| C | 0.612201000  | -1.595521000 | -0.284854000 |
| C | -0.494191000 | 0.357291000  | -0.346015000 |
| C | 0.788443000  | 0.621201000  | -0.002248000 |
| N | -0.597113000 | -1.018972000 | -0.506429000 |
| N | 1.456985000  | -0.592188000 | 0.032902000  |
| C | 2.829374000  | -0.621454000 | 0.504716000  |
| C | 3.869113000  | -0.335127000 | -0.384370000 |
| C | 3.041350000  | -0.751677000 | 1.886044000  |
| C | 5.153660000  | -0.207389000 | 0.144363000  |
| C | 4.339644000  | -0.604858000 | 2.357290000  |
| C | 5.392297000  | -0.335669000 | 1.498088000  |
| H | 5.978754000  | 0.005556000  | -0.525795000 |
| H | 4.529491000  | -0.701973000 | 3.420133000  |
| C | -1.917799000 | -1.610292000 | -0.641169000 |
| C | -2.511155000 | -1.727560000 | -1.903812000 |
| C | -2.621853000 | -1.906426000 | 0.543107000  |
| C | -3.805429000 | -2.242844000 | -1.965136000 |
| C | -3.914791000 | -2.400363000 | 0.417564000  |
| C | -4.500498000 | -2.583824000 | -0.823041000 |
| H | -4.278373000 | -2.359213000 | -2.933326000 |
| H | -4.475636000 | -2.644306000 | 1.311291000  |
| C | -2.057374000 | -1.683932000 | 1.932265000  |
| H | -0.969689000 | -1.639994000 | 1.855378000  |
| C | -1.866932000 | -1.285006000 | -3.198166000 |
| H | -0.873660000 | -0.897252000 | -2.970222000 |
| C | 3.691364000  | -0.172743000 | -1.878445000 |
| H | 2.634365000  | -0.302308000 | -2.117619000 |
| C | 1.932899000  | -1.039688000 | 2.874412000  |
| H | 1.036719000  | -1.301645000 | 2.310966000  |
| C | 1.100633000  | -3.072265000 | -0.401415000 |
| O | 2.161903000  | -3.246178000 | 0.412543000  |
| C | 1.459198000  | -3.318301000 | -1.849494000 |
| C | -0.043175000 | -4.080484000 | 0.131249000  |
| H | 1.187886000  | -3.916468000 | 1.491340000  |
| C | 1.371062000  | -2.611446000 | -3.004299000 |
| O | 2.089513000  | -4.495640000 | -2.094178000 |
| O | 0.227336000  | -4.218370000 | 1.491763000  |
| H | -1.026723000 | -3.635778000 | -0.022000000 |
| C | -0.065319000 | -5.418524000 | -0.524179000 |
| C | 1.963502000  | -3.411377000 | -4.026466000 |
| H | 0.955303000  | -1.626514000 | -3.126242000 |
| C | 2.381573000  | -4.541592000 | -3.413655000 |
| C | 0.372945000  | -6.644099000 | -0.140355000 |
| O | -0.678079000 | -5.506028000 | -1.731785000 |
| H | 2.070347000  | -3.167579000 | -5.072059000 |
| H | 2.887039000  | -5.430442000 | -3.756036000 |

|   |              |              |              |
|---|--------------|--------------|--------------|
| C | 0.023654000  | -7.544243000 | -1.193569000 |
| H | 0.883081000  | -6.875031000 | 0.780947000  |
| C | -0.607998000 | -6.800661000 | -2.131205000 |
| H | 0.213068000  | -8.605741000 | -1.241055000 |
| H | -1.056546000 | -7.028703000 | -3.084721000 |
| H | 3.667488000  | -3.856332000 | 0.181013000  |
| O | 4.605643000  | -4.184487000 | 0.177683000  |
| C | 4.607405000  | -5.524754000 | 0.600004000  |
| H | 4.190960000  | -5.644585000 | 1.609305000  |
| H | 4.040607000  | -6.177116000 | -0.077991000 |
| H | 5.640470000  | -5.881241000 | 0.620742000  |
| H | -5.508021000 | -2.978048000 | -0.895382000 |
| H | 6.398216000  | -0.223992000 | 1.887523000  |
| C | 2.264207000  | -2.233845000 | 3.766801000  |
| H | 1.396229000  | -2.490983000 | 4.379282000  |
| H | 2.538217000  | -3.106358000 | 3.171502000  |
| H | 3.090780000  | -2.008726000 | 4.445365000  |
| C | 1.609557000  | 0.185636000  | 3.729779000  |
| H | 1.305774000  | 1.040185000  | 3.121854000  |
| H | 0.794148000  | -0.044173000 | 4.420713000  |
| H | 2.478961000  | 0.484172000  | 4.322161000  |
| C | -2.392941000 | -2.818725000 | 2.896482000  |
| H | -3.457103000 | -2.835279000 | 3.143577000  |
| H | -2.109745000 | -3.788479000 | 2.487552000  |
| H | -1.844812000 | -2.672173000 | 3.830402000  |
| C | -2.546198000 | -0.357032000 | 2.517744000  |
| H | -2.124404000 | -0.215772000 | 3.516141000  |
| H | -2.259049000 | 0.499497000  | 1.907504000  |
| H | -3.636079000 | -0.359453000 | 2.608051000  |
| C | -1.727026000 | -2.446415000 | -4.180185000 |
| H | -1.185787000 | -2.120077000 | -5.071741000 |
| H | -1.185178000 | -3.284057000 | -3.740438000 |
| H | -2.710461000 | -2.801295000 | -4.498887000 |
| C | -2.660704000 | -0.151212000 | -3.850743000 |
| H | -3.651819000 | -0.494889000 | -4.157264000 |
| H | -2.791546000 | 0.697671000  | -3.178137000 |
| H | -2.137386000 | 0.198471000  | -4.744160000 |
| C | 4.478501000  | -1.243048000 | -2.633752000 |
| H | 4.197474000  | -2.247682000 | -2.315308000 |
| H | 4.288266000  | -1.162096000 | -3.706682000 |
| H | 5.552663000  | -1.118582000 | -2.472987000 |
| C | 4.115291000  | 1.214429000  | -2.360897000 |
| H | 3.929828000  | 1.306480000  | -3.434103000 |
| H | 3.569123000  | 2.011125000  | -1.853561000 |
| H | 5.182707000  | 1.379194000  | -2.192779000 |
| C | -1.604671000 | 1.313605000  | -0.565258000 |

|   |              |             |              |
|---|--------------|-------------|--------------|
| H | -1.564696000 | 1.728459000 | -1.575650000 |
| H | -2.578783000 | 0.845434000 | -0.431594000 |
| H | -1.522907000 | 2.145419000 | 0.135705000  |
| C | 1.414377000  | 1.932157000 | 0.285140000  |
| H | 0.653482000  | 2.627772000 | 0.639838000  |
| H | 2.191263000  | 1.850839000 | 1.044563000  |
| H | 1.866021000  | 2.363956000 | -0.610947000 |

VI... IPr<sup>Me</sup>-I(H)      Etot = -2039.523668970215 a.u.      symmetry c1

|   |              |              |              |
|---|--------------|--------------|--------------|
| C | -1.868169000 | 0.639118000  | -0.395752000 |
| C | -2.736912000 | 1.784150000  | -2.169945000 |
| C | -1.409570000 | 1.626873000  | -2.402244000 |
| N | -2.982757000 | 1.173389000  | -0.944182000 |
| N | -0.911159000 | 0.929432000  | -1.305612000 |
| C | 0.458234000  | 0.546060000  | -1.153933000 |
| C | 1.349362000  | 1.444790000  | -0.553633000 |
| C | 0.861199000  | -0.715168000 | -1.610211000 |
| C | 2.668011000  | 1.032343000  | -0.382394000 |
| C | 2.191392000  | -1.079448000 | -1.417305000 |
| C | 3.085893000  | -0.218817000 | -0.804020000 |
| H | 3.378044000  | 1.701328000  | 0.091048000  |
| H | 2.530353000  | -2.053538000 | -1.752766000 |
| C | -4.271545000 | 1.103300000  | -0.326757000 |
| C | -5.103081000 | 0.015208000  | -0.621521000 |
| C | -4.657351000 | 2.122260000  | 0.553241000  |
| C | -6.345613000 | -0.039626000 | 0.004224000  |
| C | -5.910067000 | 2.021171000  | 1.152838000  |
| C | -6.747023000 | 0.951627000  | 0.883721000  |
| H | -7.007151000 | -0.874787000 | -0.198121000 |
| H | -6.232677000 | 2.791808000  | 1.844310000  |
| C | -3.763214000 | 3.298756000  | 0.880826000  |
| H | -2.865916000 | 3.224021000  | 0.262710000  |
| C | -4.687970000 | -1.094177000 | -1.563956000 |
| H | -3.734691000 | -0.813530000 | -2.017256000 |
| C | 0.922279000  | 2.818657000  | -0.081903000 |
| H | -0.091813000 | 2.999751000  | -0.445240000 |
| C | -0.087755000 | -1.676769000 | -2.293116000 |
| H | -1.052334000 | -1.177187000 | -2.406035000 |
| H | -1.933663000 | -0.282851000 | 1.124922000  |
| O | -2.105463000 | -0.836029000 | 1.965715000  |
| C | -0.899826000 | -1.284602000 | 2.498254000  |
| C | -0.286750000 | -0.280832000 | 3.483593000  |
| H | -0.160142000 | -1.452701000 | 1.703036000  |
| C | -1.090118000 | -2.582044000 | 3.210199000  |



|   |              |              |              |
|---|--------------|--------------|--------------|
| O | -0.979710000 | 0.557336000  | 4.036428000  |
| C | 1.139122000  | -0.377045000 | 3.723113000  |
| C | -1.405077000 | -2.910796000 | 4.489101000  |
| O | -0.990589000 | -3.708027000 | 2.457568000  |
| C | 2.131490000  | -1.154466000 | 3.189564000  |
| O | 1.670998000  | 0.460595000  | 4.654455000  |
| C | -1.510767000 | -4.333226000 | 4.526378000  |
| H | -1.546372000 | -2.222454000 | 5.308384000  |
| C | -1.250727000 | -4.759969000 | 3.268050000  |
| C | 3.331894000  | -0.771556000 | 3.830831000  |
| H | 2.015063000  | -1.908520000 | 2.426621000  |
| C | 2.986265000  | 0.210984000  | 4.707026000  |
| H | -1.746570000 | -4.952736000 | 5.377633000  |
| H | -1.209576000 | -5.734491000 | 2.808551000  |
| H | 4.321876000  | -1.166648000 | 3.666901000  |
| H | 3.555189000  | 0.802295000  | 5.407515000  |
| O | -0.425979000 | 3.031734000  | 5.282709000  |
| C | -0.205864000 | 2.896712000  | 6.670001000  |
| H | -0.521875000 | 2.142916000  | 4.901510000  |
| H | -1.039908000 | 2.392106000  | 7.172474000  |
| H | 0.715196000  | 2.343176000  | 6.888711000  |
| H | -0.109990000 | 3.898428000  | 7.092774000  |
| H | -7.718235000 | 0.889915000  | 1.362638000  |
| H | 4.116933000  | -0.522617000 | -0.658637000 |
| C | -4.469161000 | -2.402083000 | -0.803890000 |
| H | -5.399912000 | -2.744410000 | -0.342793000 |
| H | -4.124800000 | -3.183033000 | -1.487095000 |
| H | -3.723477000 | -2.282771000 | -0.014929000 |
| C | -5.696073000 | -1.290664000 | -2.694437000 |
| H | -5.855653000 | -0.366091000 | -3.254248000 |
| H | -5.332836000 | -2.051404000 | -3.390155000 |
| H | -6.663755000 | -1.625834000 | -2.312228000 |
| C | 0.402906000  | -2.052859000 | -3.690296000 |
| H | -0.330263000 | -2.696691000 | -4.182933000 |
| H | 0.552318000  | -1.168161000 | -4.313638000 |
| H | 1.348844000  | -2.598982000 | -3.645969000 |
| C | -0.314066000 | -2.928429000 | -1.447254000 |
| H | -0.717303000 | -2.676556000 | -0.464298000 |
| H | -1.021683000 | -3.597067000 | -1.944606000 |
| H | 0.620736000  | -3.476704000 | -1.300878000 |
| C | -4.437077000 | 4.631081000  | 0.557834000  |
| H | -4.745233000 | 4.680808000  | -0.489185000 |
| H | -5.322478000 | 4.789682000  | 1.179020000  |
| H | -3.745414000 | 5.455680000  | 0.748470000  |
| C | -3.320552000 | 3.259090000  | 2.342961000  |
| H | -2.637309000 | 4.086023000  | 2.553882000  |

|   |              |             |              |
|---|--------------|-------------|--------------|
| H | -4.179380000 | 3.353971000 | 3.013338000  |
| H | -2.808345000 | 2.323962000 | 2.579131000  |
| C | 1.816012000  | 3.920579000 | -0.647216000 |
| H | 2.839216000  | 3.838933000 | -0.271818000 |
| H | 1.852375000  | 3.886786000 | -1.738692000 |
| H | 1.431894000  | 4.899580000 | -0.349769000 |
| C | 0.881442000  | 2.887839000 | 1.443717000  |
| H | 0.186413000  | 2.153120000 | 1.854401000  |
| H | 1.870547000  | 2.697623000 | 1.870112000  |
| H | 0.558351000  | 3.880110000 | 1.769608000  |
| C | -3.790116000 | 2.445298000 | -2.975216000 |
| H | -3.361293000 | 2.845363000 | -3.893729000 |
| H | -4.585139000 | 1.746778000 | -3.248695000 |
| H | -4.253170000 | 3.271749000 | -2.429747000 |
| C | -0.566235000 | 2.061340000 | -3.540247000 |
| H | 0.206896000  | 2.766480000 | -3.223618000 |
| H | -0.063149000 | 1.213427000 | -4.012152000 |
| H | -1.181068000 | 2.552158000 | -4.294383000 |
